# Supplementary material for: Synthesis and antioxidant activities of berberine 9-O-benzoic acid derivatives
Source: Royal Society of Chemistry journal article supplement (doi:10.1039/d1ra01339d), 2021-01-01
Supplement: d1ra01339d1.pdf [file d1ra01339d1.pdf]

## Supporting Information

### Synthesis and Antioxidant Activities of Berberine 9-*O*- benzoic Acid Derivatives

Yanfei Liu<sup>a</sup>, Shuo Long<sup>a</sup>, Shanshan Zhang<sup>a</sup>, Yifu Tan<sup>a</sup>, Ting Wang<sup>b</sup>, Yuwei Wu<sup>b</sup>, Ting Jiang<sup>a</sup>,  
Xiaoqin Liu<sup>a</sup>, Dongming Peng<sup>c</sup>, Zhenbao Liu<sup>b,\*</sup>

*a* Department of Pharmaceutical Engineering, College of Chemistry and Chemical Engineering,  
Central South University, Changsha, 410083, China.

*b* Department of Pharmaceutics, Xiangya School of Pharmaceutical Sciences, Central South  
University, Changsha, 410013, China.

*c* Department of Medicinal Chemistry, School of Pharmacy, Hunan University of Chinese  
Medicine, Changsha, 410208, China.

Supporting Information relating to this article is available online, alongside **Figure S1-S48**.

**Figure S1.** Mass spectrum of compound **8a**  
**Figure S2.** Mass spectrum of compound **8b**  
**Figure S3.** Mass spectrum of compound **8c**  
**Figure S4.** Mass spectrum of compound **8d**  
**Figure S5.** Mass spectrum of compound **8e**  
**Figure S6.** Mass spectrum of compound **8f**  
**Figure S7.** Mass spectrum of compound **8g**  
**Figure S8.** Mass spectrum of compound **8h**  
**Figure S9.** Mass spectrum of compound **8i**  
**Figure S10.** Mass spectrum of compound **8j**  
**Figure S11.** Mass spectrum of compound **8k**  
**Figure S12.** Mass spectrum of compound **8l**  
**Figure S13.** Mass spectrum of compound **8m**  
**Figure S14.** Mass spectrum of compound **8n**  
**Figure S15.** Mass spectrum of compound **8o**  
**Figure S16.** Mass spectrum of compound **8p**  
**Figure S17.**  $^1\text{H}$  NMR spectrum of compound **8a**  
**Figure S18.**  $^1\text{H}$  NMR spectrum of compound **8b**  
**Figure S19.**  $^1\text{H}$  NMR spectrum of compound **8c**  
**Figure S20.**  $^1\text{H}$  NMR spectrum of compound **8d**  
**Figure S21.**  $^1\text{H}$  NMR spectrum of compound **8e**  
**Figure S22.**  $^1\text{H}$  NMR spectrum of compound **8f**  
**Figure S23.**  $^1\text{H}$  NMR spectrum of compound **8g**  
**Figure S24.**  $^1\text{H}$  NMR spectrum of compound **8h**  
**Figure S25.**  $^1\text{H}$  NMR spectrum of compound **8i**  
**Figure S26.**  $^1\text{H}$  NMR spectrum of compound **8j**  
**Figure S27.**  $^1\text{H}$  NMR spectrum of compound **8k**  
**Figure S28.**  $^1\text{H}$  NMR spectrum of compound **8l**  
**Figure S29.**  $^1\text{H}$  NMR spectrum of compound **8m**  
**Figure S30.**  $^1\text{H}$  NMR spectrum of compound **8n**  
**Figure S31.**  $^1\text{H}$  NMR spectrum of compound **8o**  
**Figure S32.**  $^1\text{H}$  NMR spectrum of compound **8p**  
**Figure S33.** Infrared spectrum of compound **8a**  
**Figure S34.** Infrared spectrum of compound **8b**  
**Figure S35.** Infrared spectrum of compound **8c**  
**Figure S36.** Infrared spectrum of compound **8d**  
**Figure S37.** Infrared spectrum of compound **8e**  
**Figure S38.** Infrared spectrum of compound **8f**

**Figure S39.** Infrared spectrum of compound **8g**

**Figure S40.** Infrared spectrum of compound **8h**

**Figure S41.** Infrared spectrum of compound **8i**

**Figure S42.** Infrared spectrum of compound **8j**

**Figure S43.** Infrared spectrum of compound **8k**

**Figure S44.** Infrared spectrum of compound **8l**

**Figure S45.** Infrared spectrum of compound **8m**

**Figure S46.** Infrared spectrum of compound **8n**

**Figure S47.** Infrared spectrum of compound **8o**

**Figure S48.** Infrared spectrum of compound **8p**

## Appended drawings

### Mass spectrum

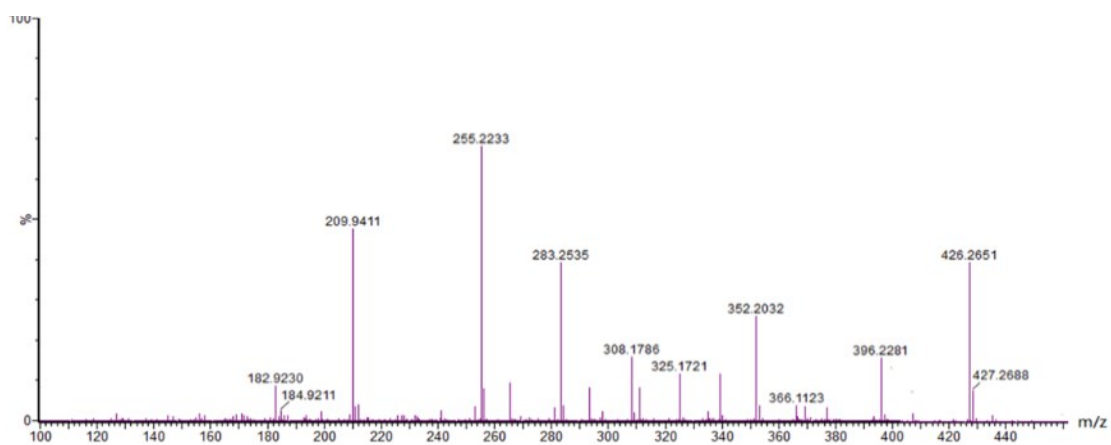

**Figure S1.** Mass spectrum of compound **8a**

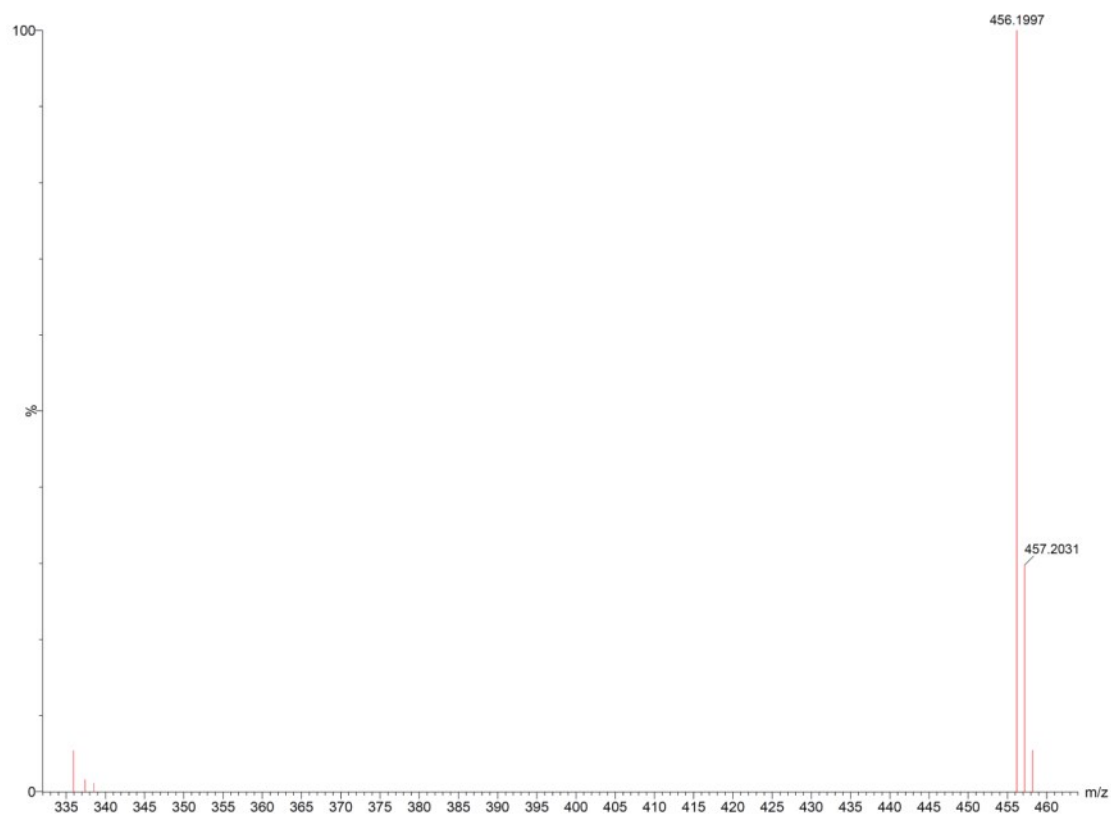

**Figure S2.** Mass spectrum of compound **8b**

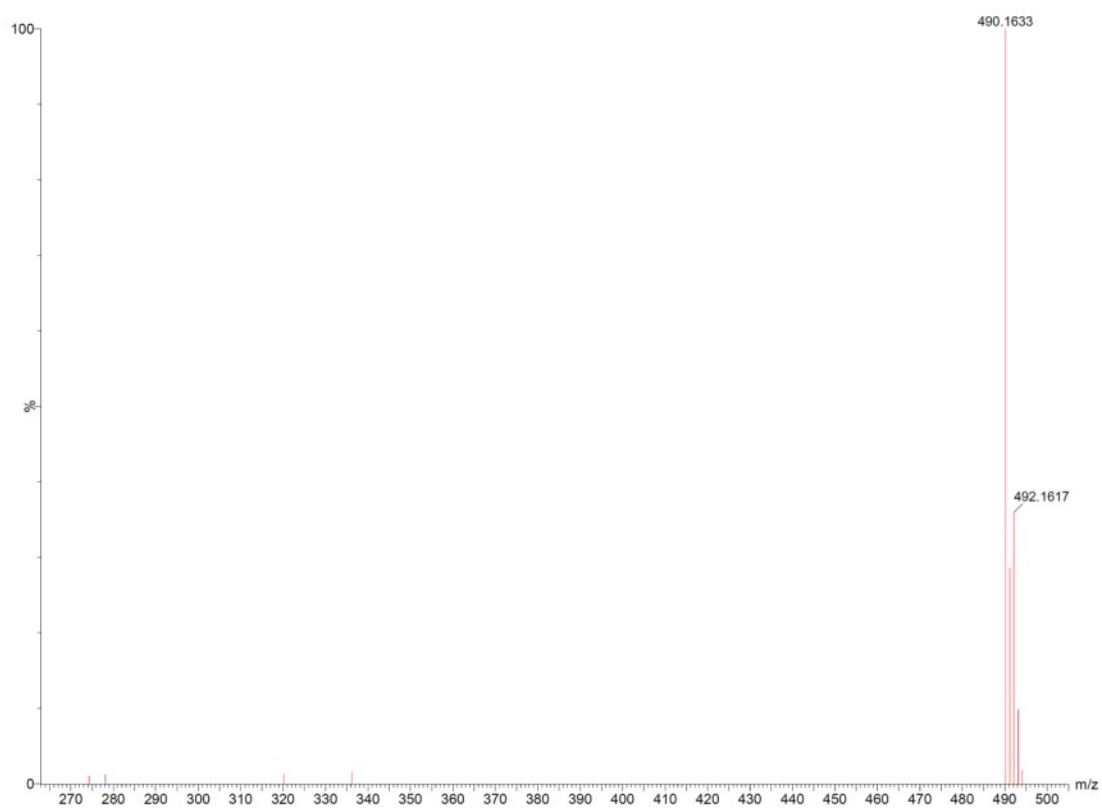

**Figure S3.** Mass spectrum of compound **8c**

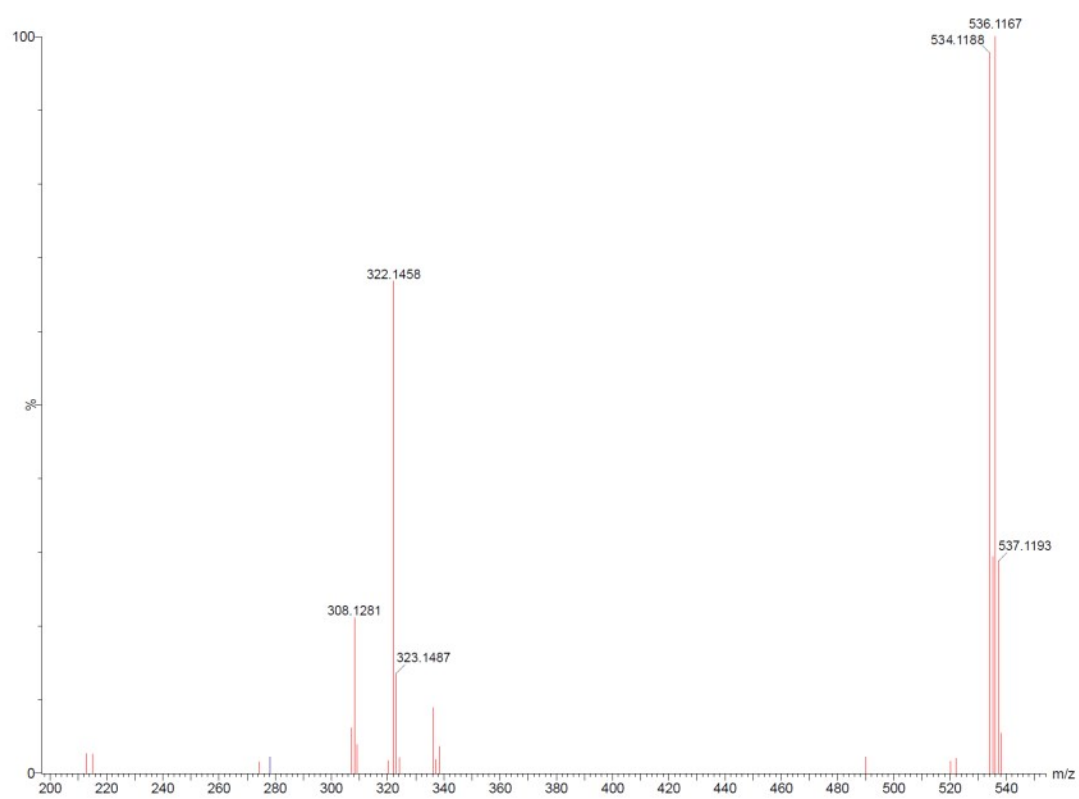

**Figure S4.** Mass spectrum of compound **8d**

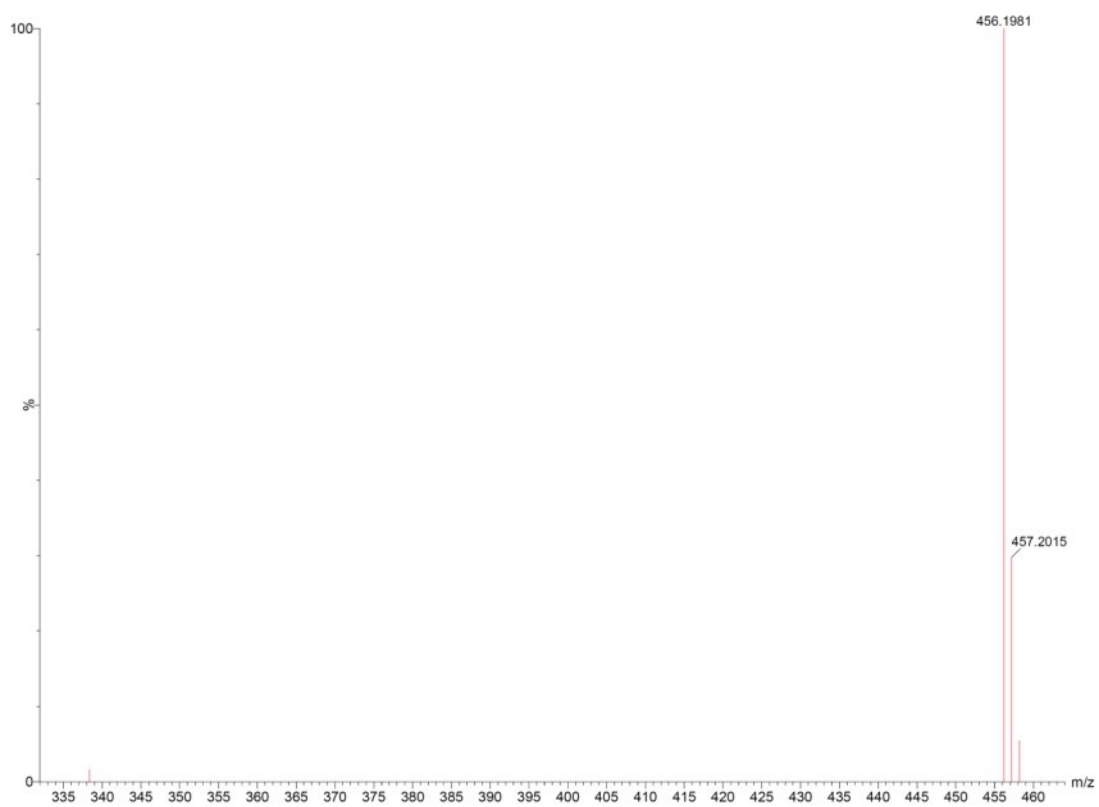

**Figure S5.** Mass spectrum of compound **8e**

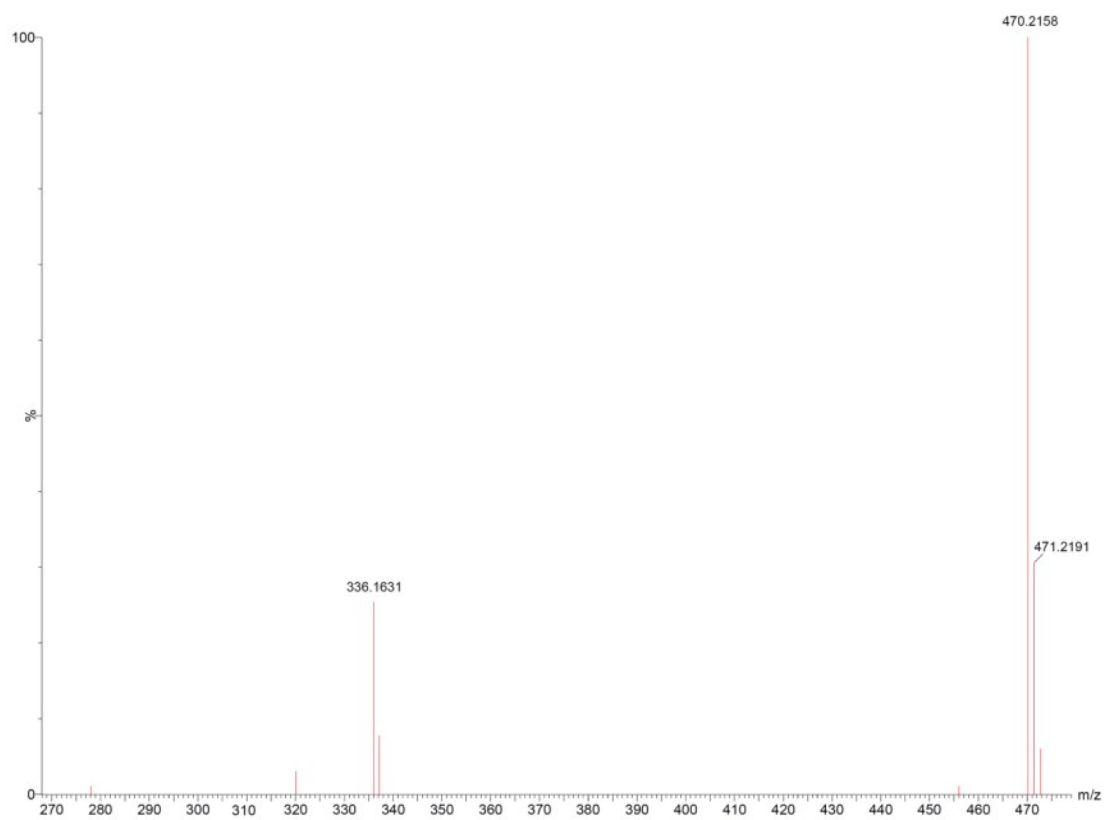

**Figure S6.** Mass spectrum of compound **8f**

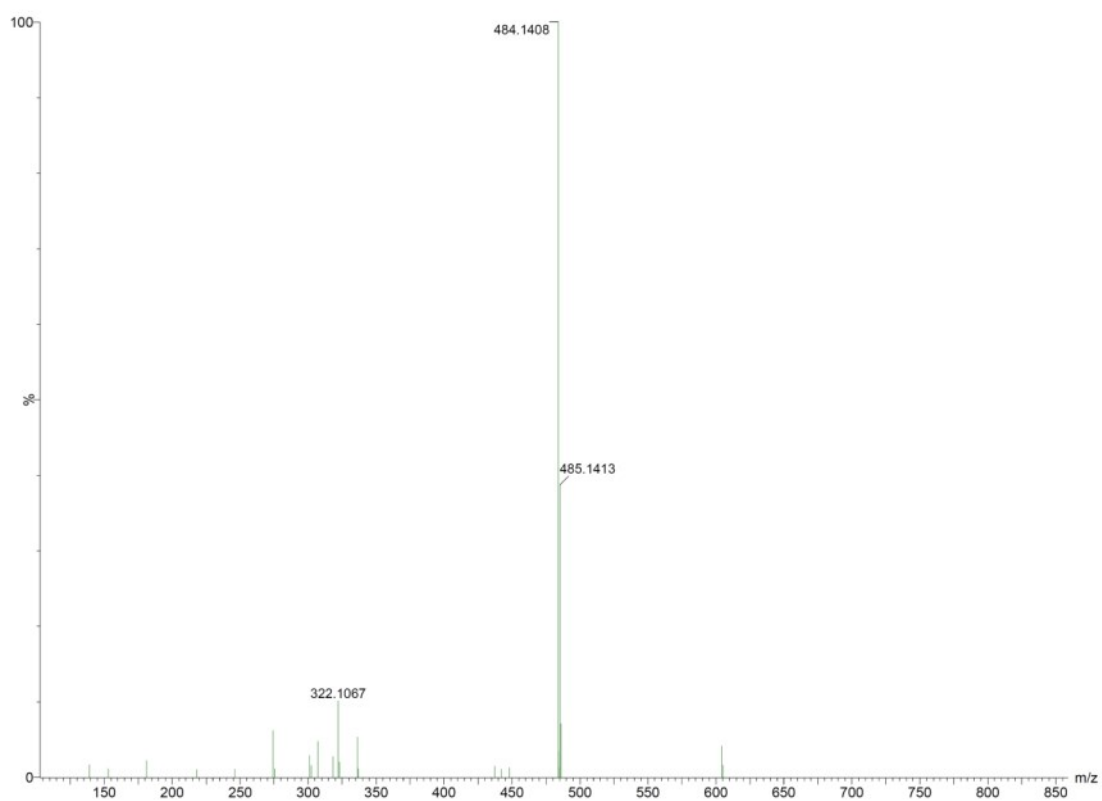

**Figure S7.** Mass spectrum of compound **8g**

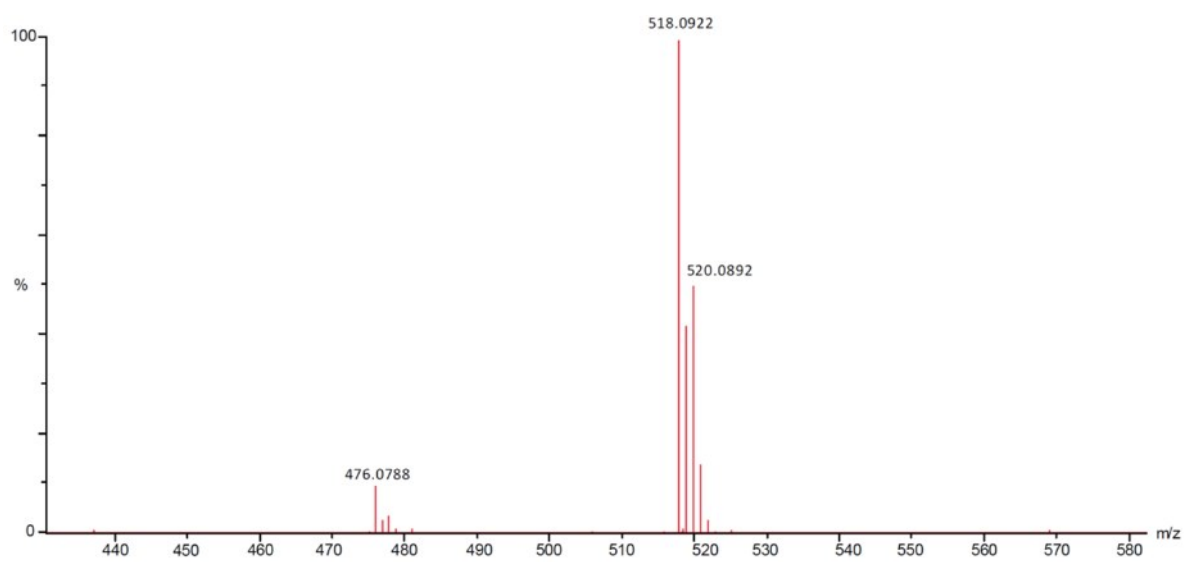

**Figure S8.** Mass spectrum of compound **8h**

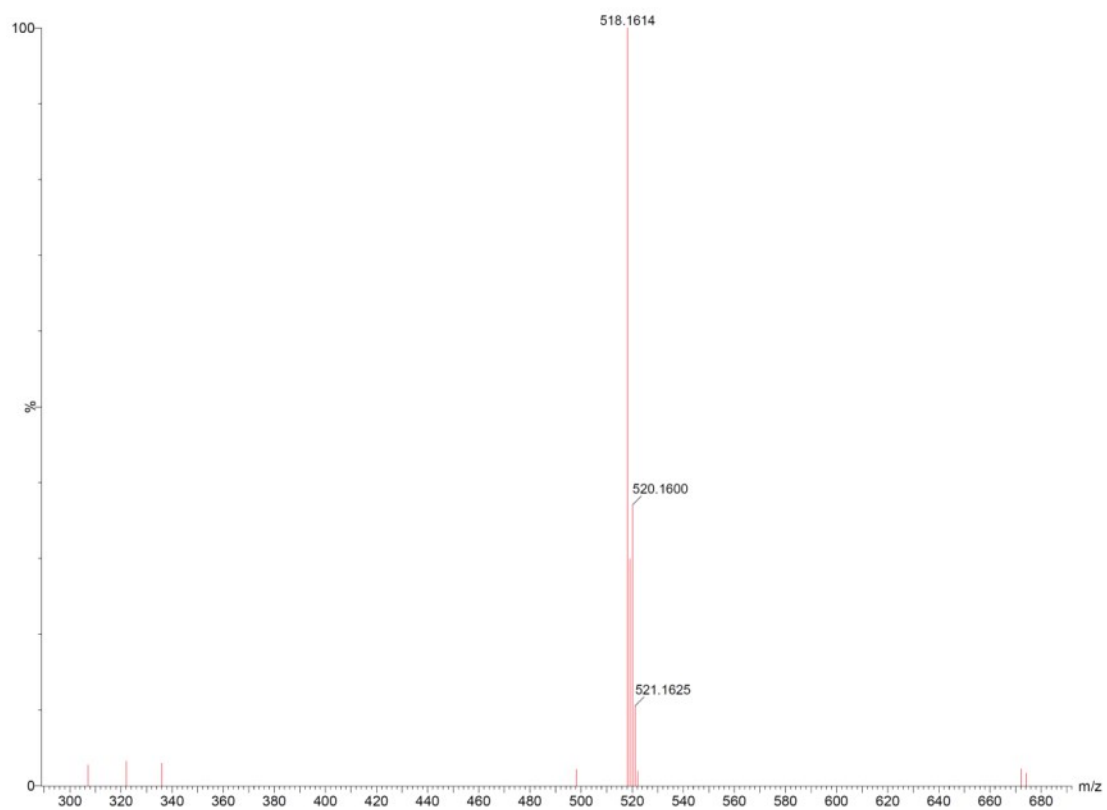

**Figure S9.** Mass spectrum of compound **8i**

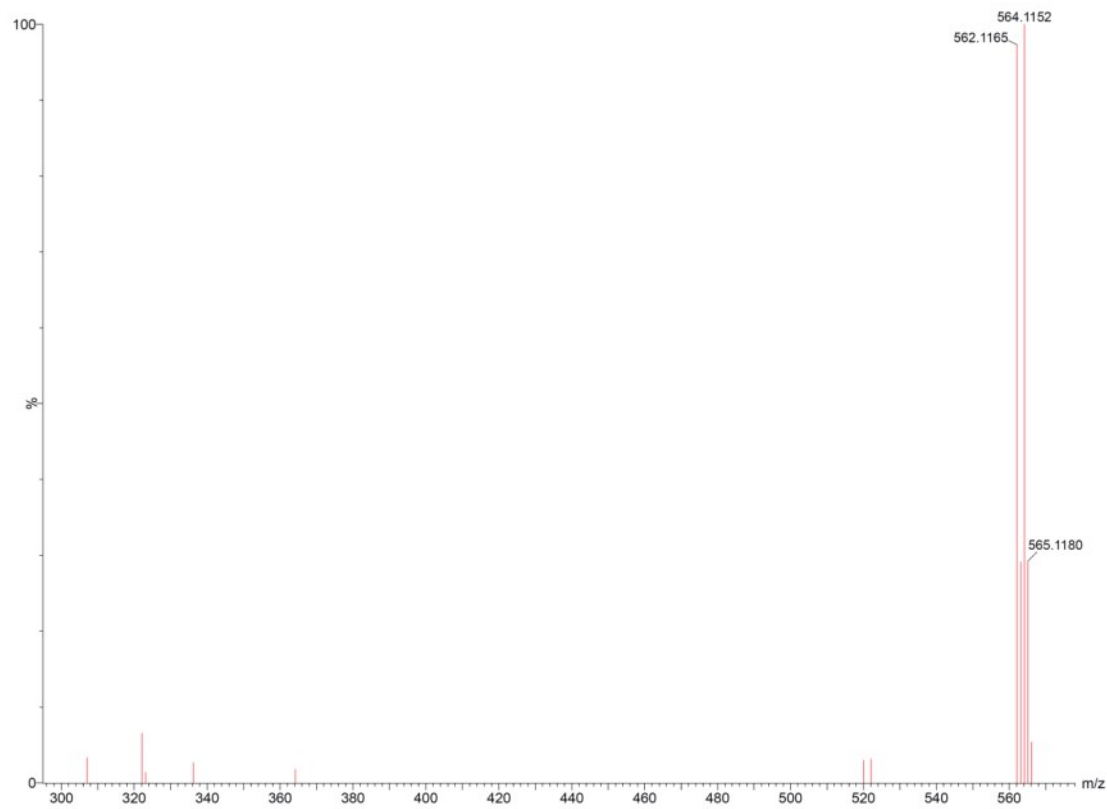

**Figure S10.** Mass spectrum of compound **8j**



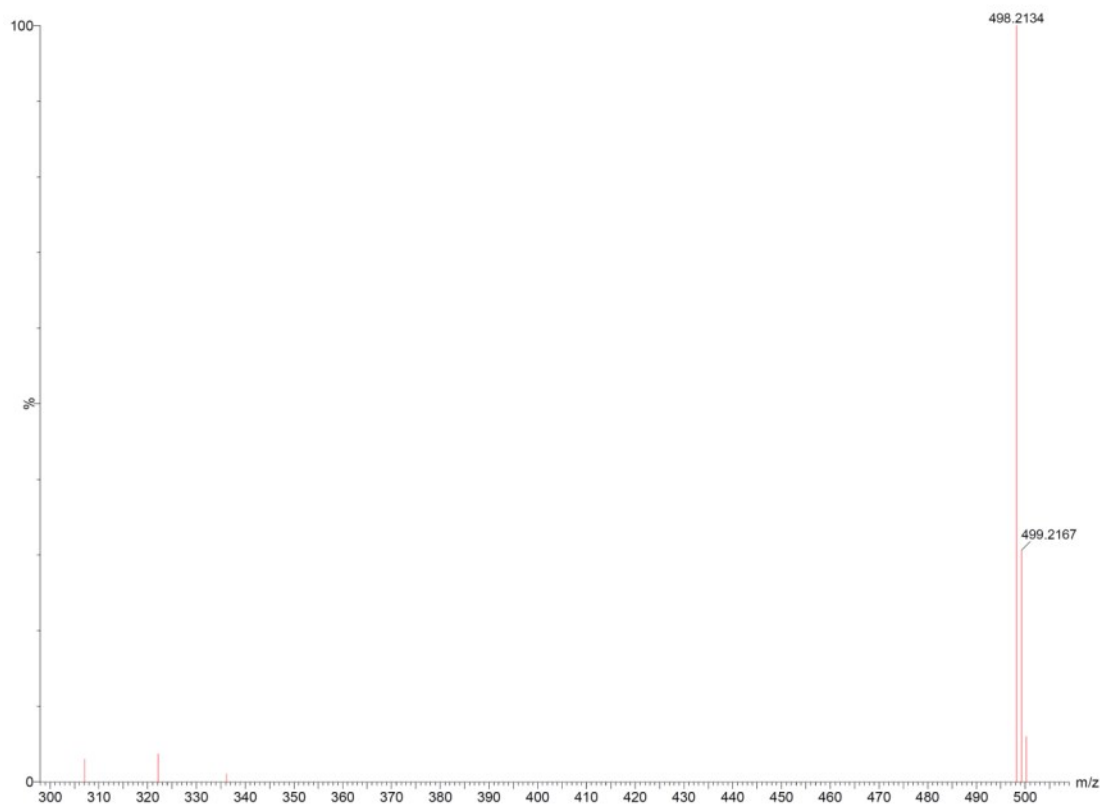

**Figure S11.** Mass spectrum of compound **8k**

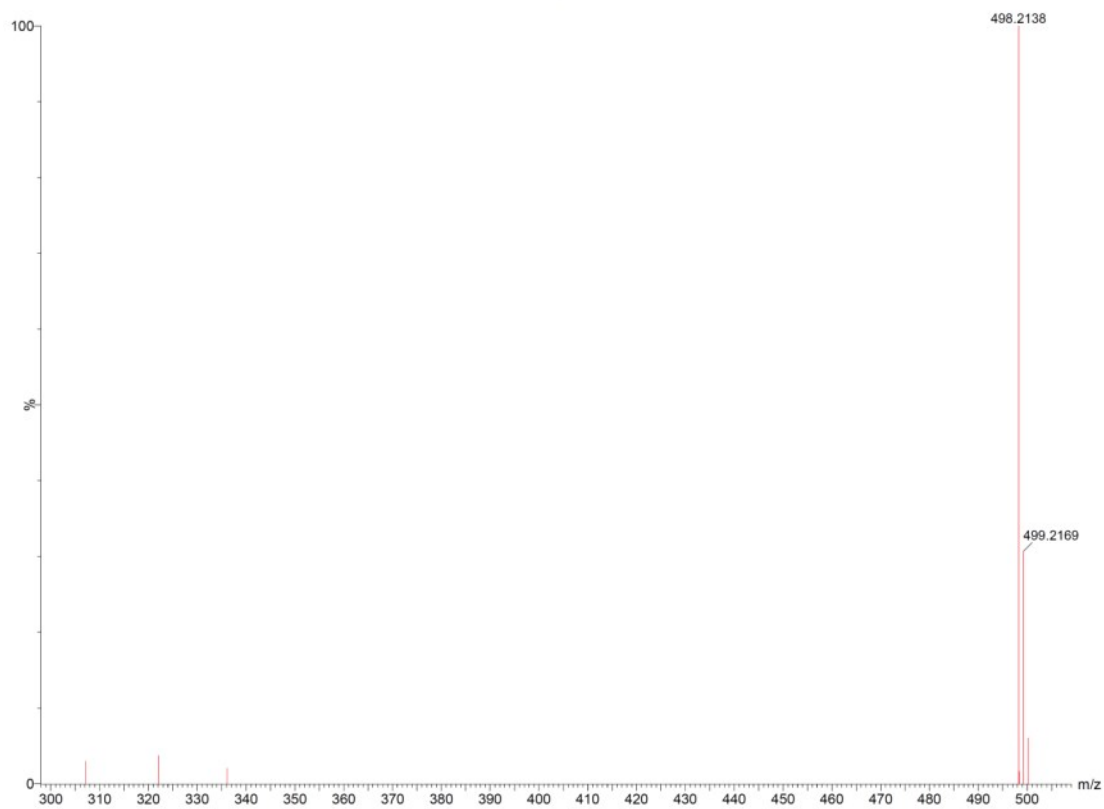

**Figure S12.** Mass spectrum of compound **8l**

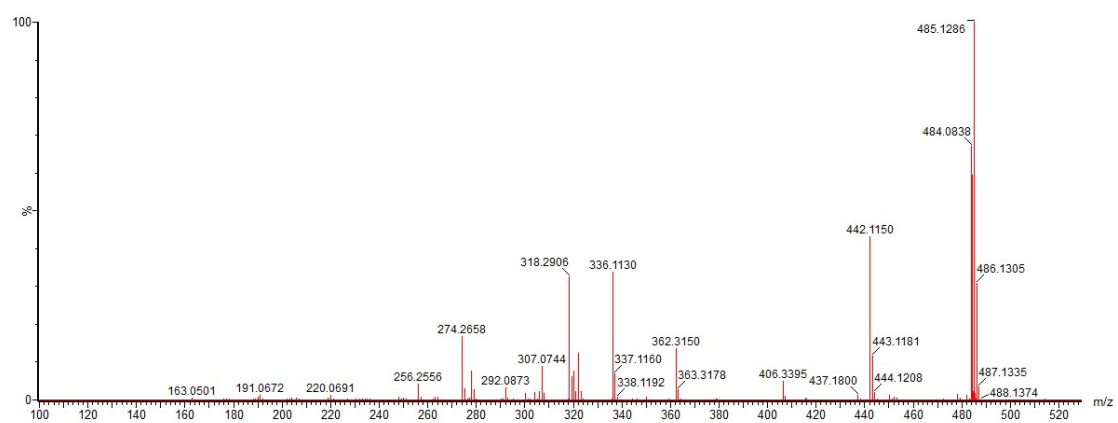

**Figure S13.** Mass spectrum of compound **8m**

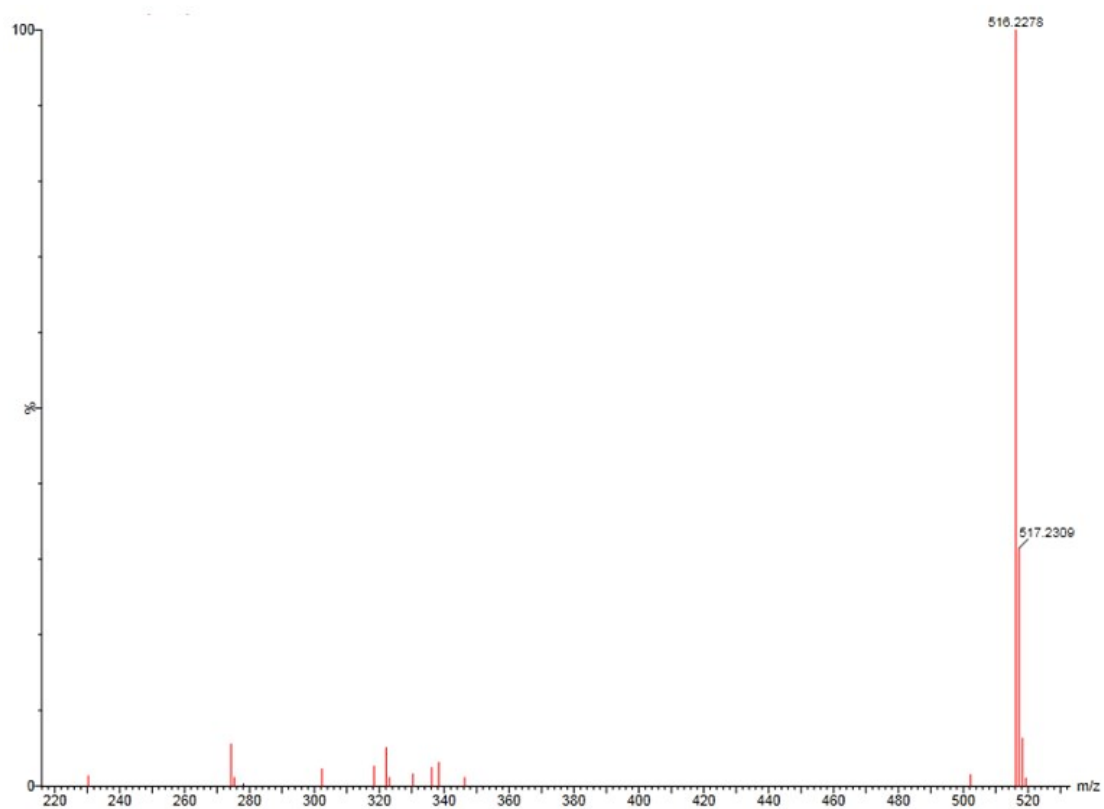

**Figure S14.** Mass spectrum of compound **8n**

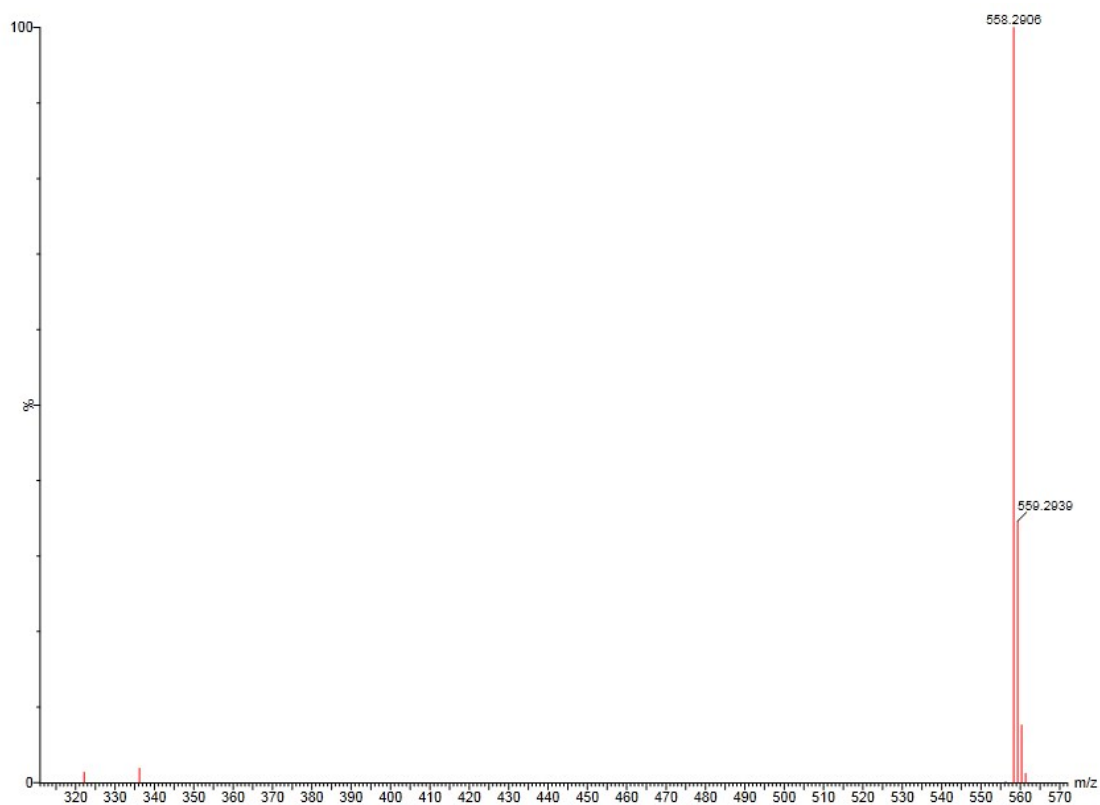

Figure S15. Mass spectrum of compound **8o**

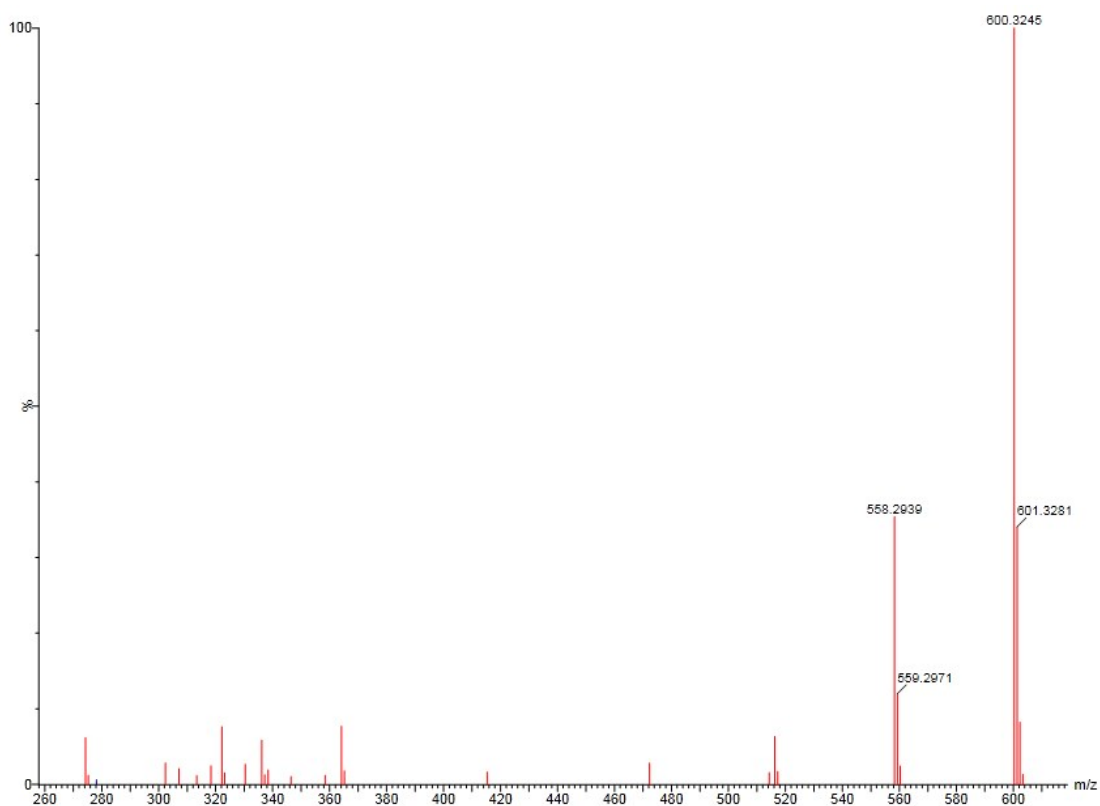

Figure S16. Mass spectrum of compound **8p**

### <sup>1</sup>H NMR spectrum

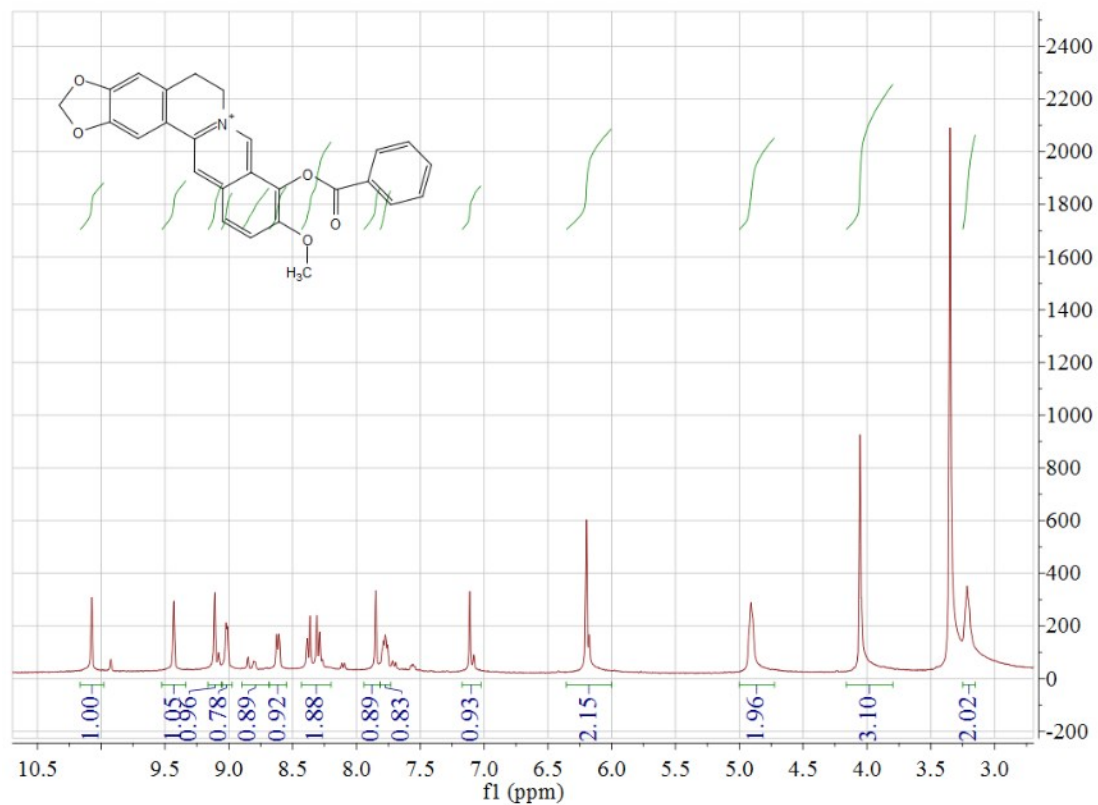

Figure S17. <sup>1</sup>H NMR spectrum of compound 8a

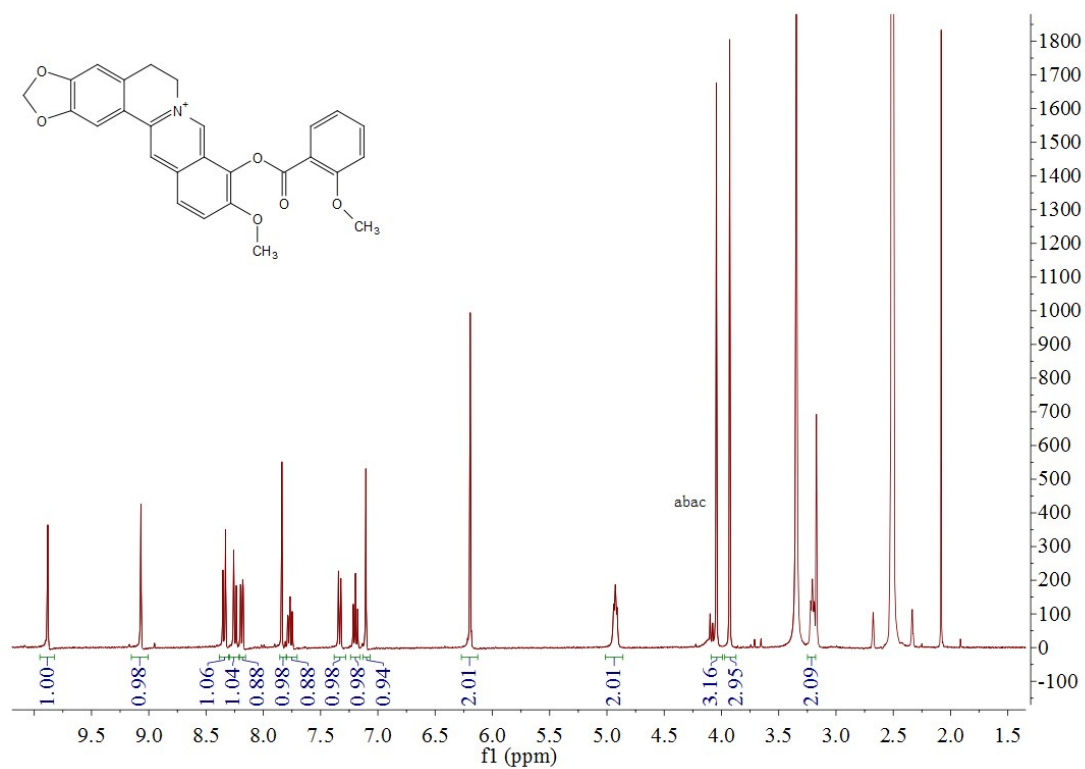

Figure S18. <sup>1</sup>H NMR spectrum of compound 8b

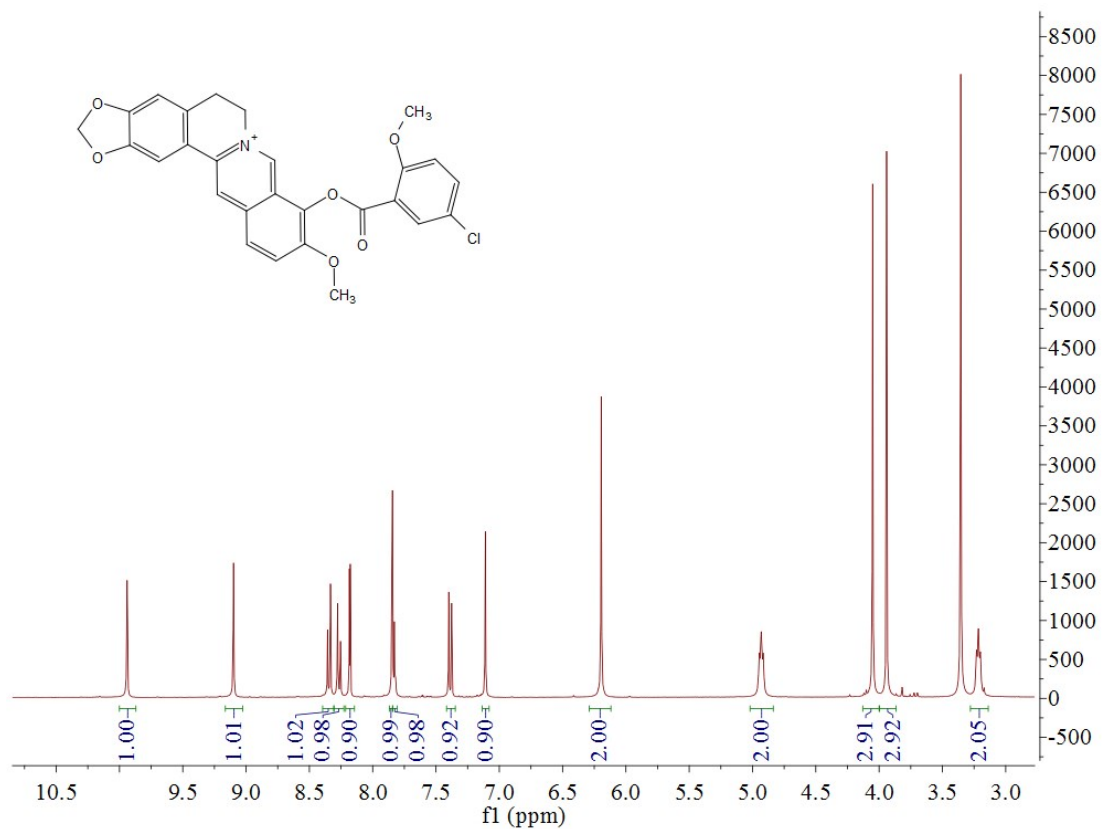

**Figure S19.** <sup>1</sup>H NMR spectrum of compound **8c**

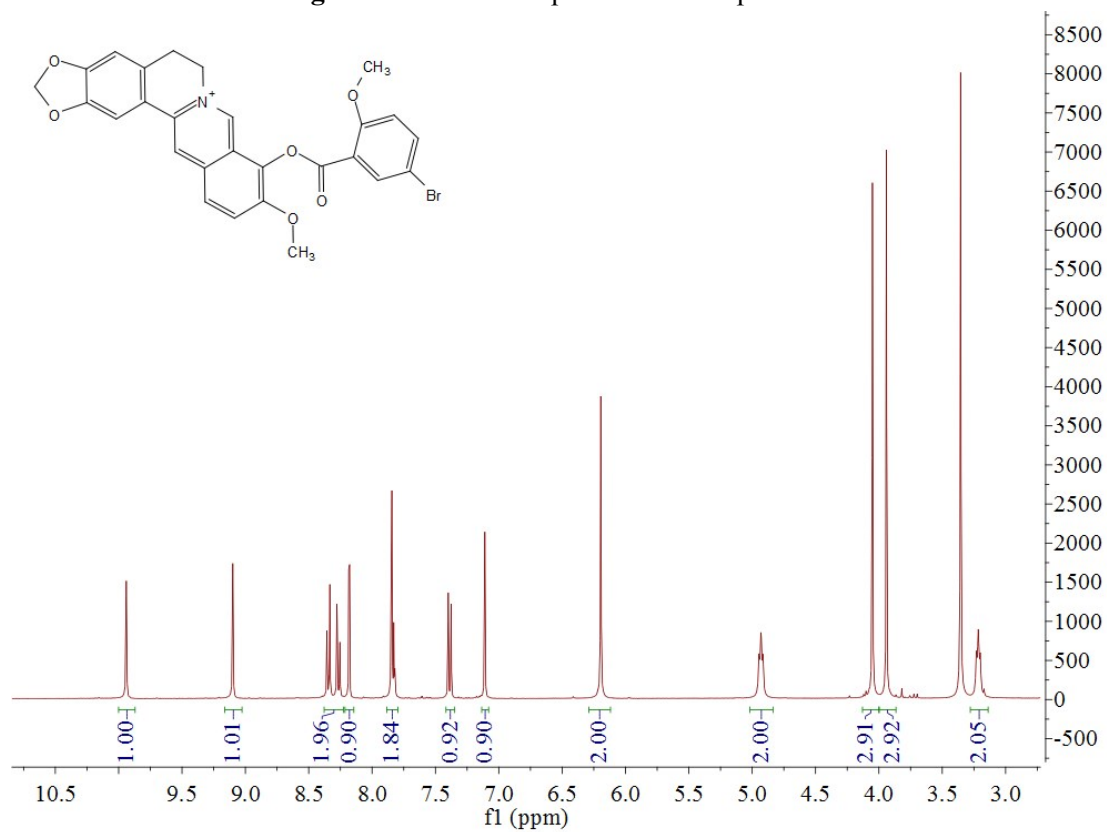

**Figure S20.** <sup>1</sup>H NMR spectrum of compound **8d**

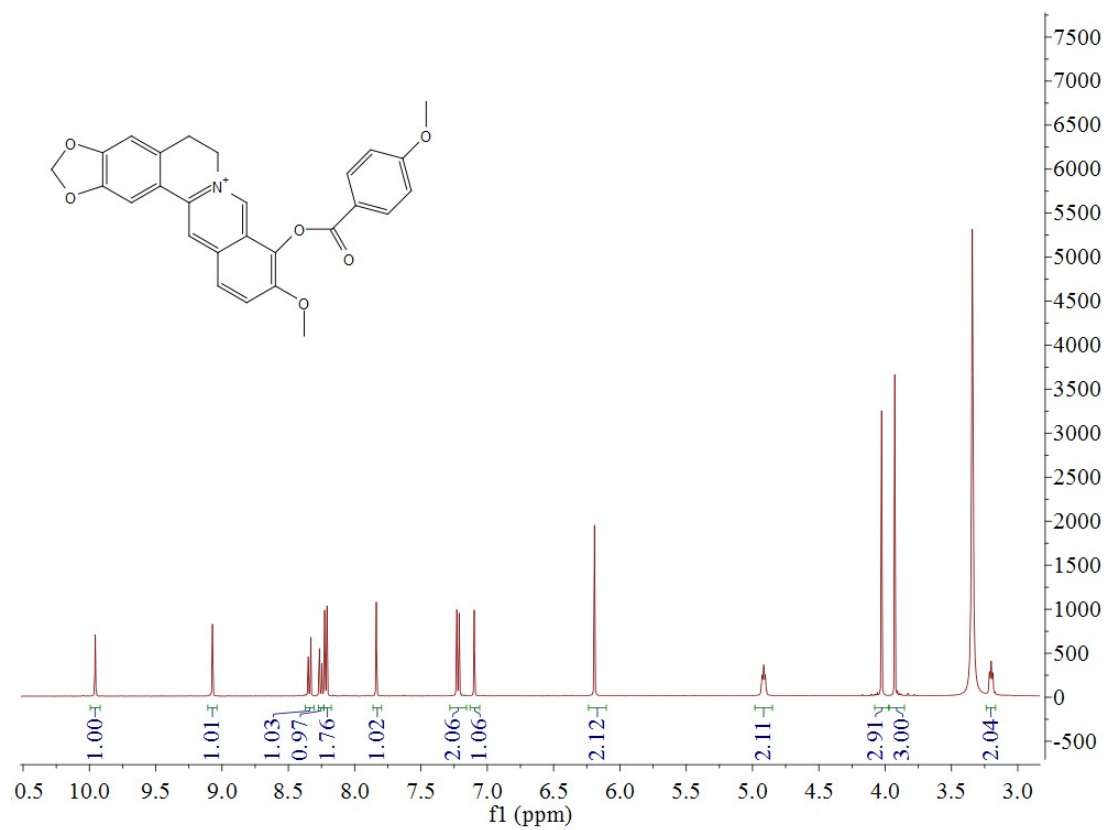

**Figure S21.**  $^1\text{H}$  NMR spectrum of compound **8e**

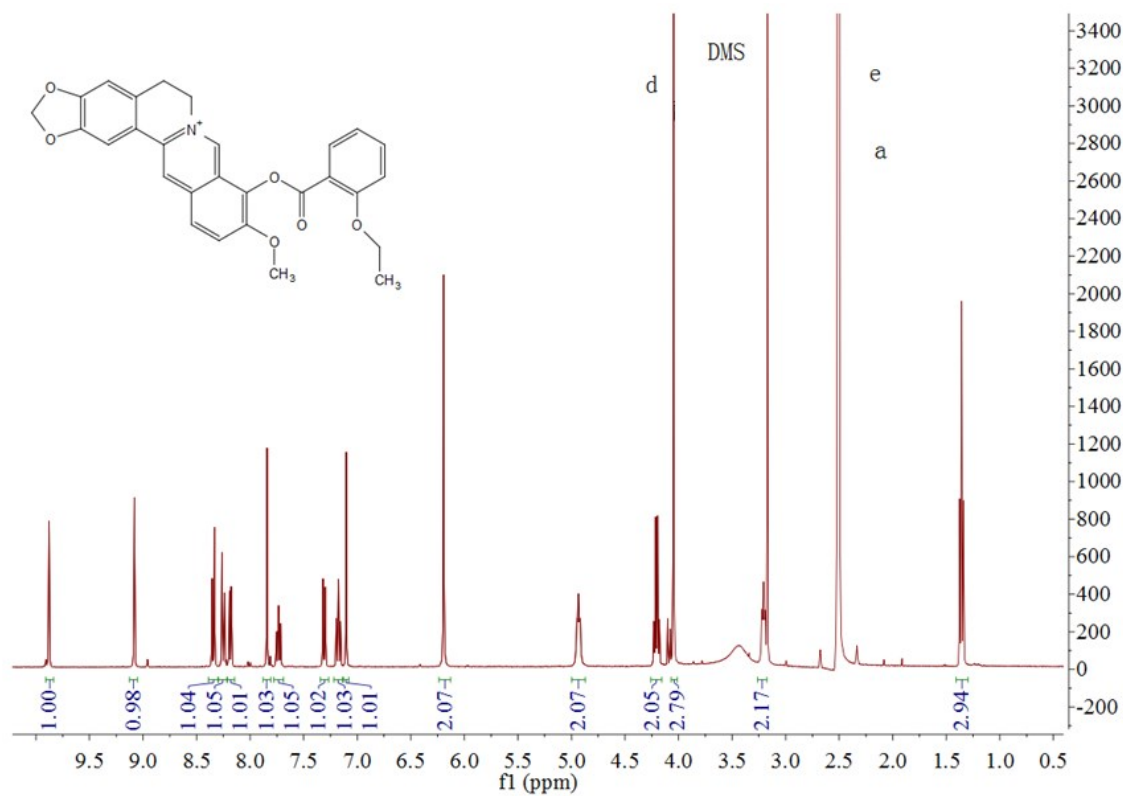

**Figure S22.**  $^1\text{H}$  NMR spectrum of compound **8f**

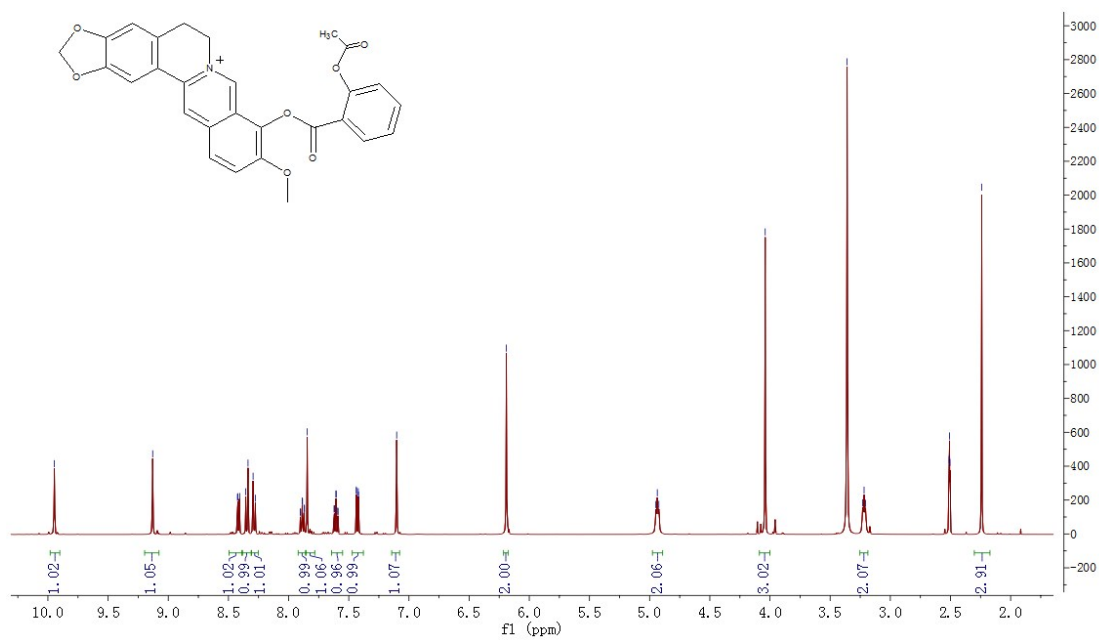

Figure S23. <sup>1</sup>H NMR spectrum of compound 8g

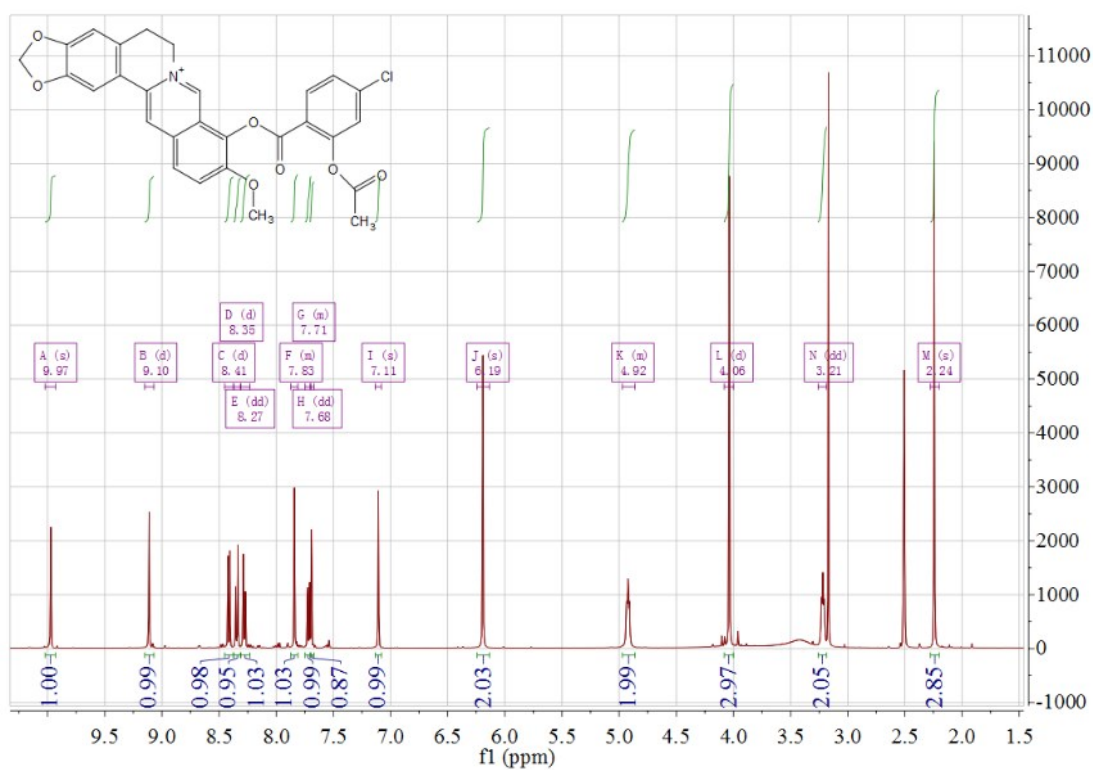

Figure S24. <sup>1</sup>H NMR spectrum of compound 8h

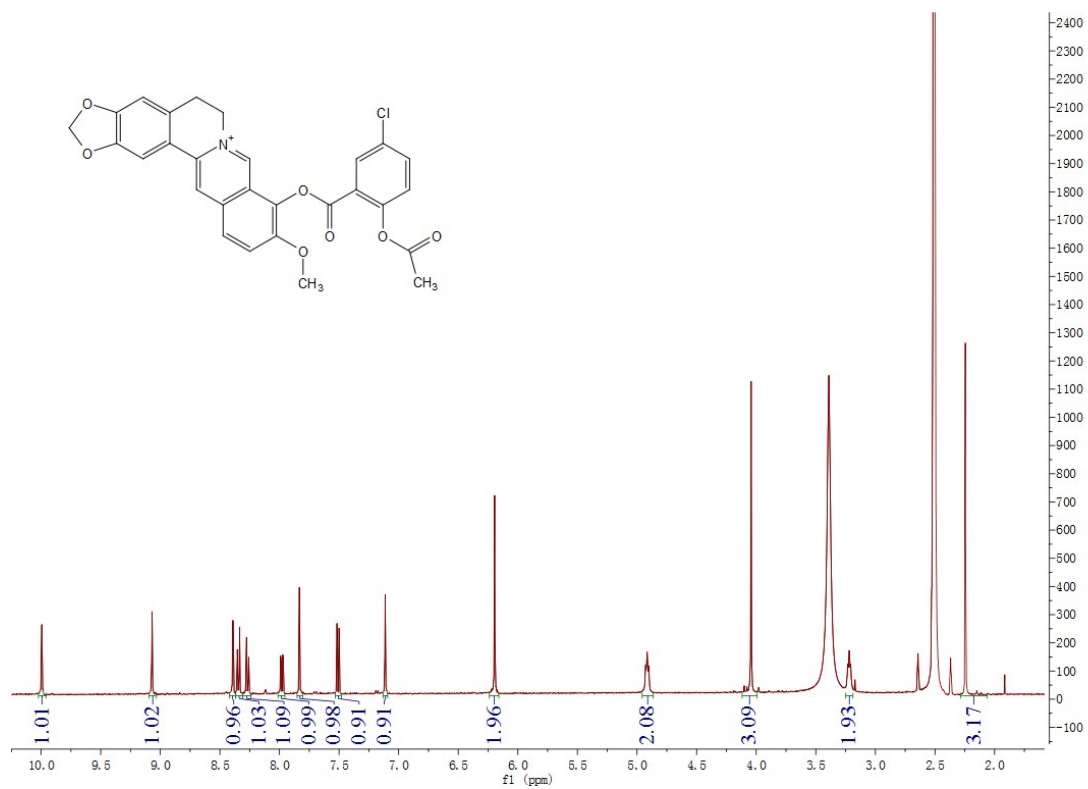

**Figure S25.**  $^1\text{H}$  NMR spectrum of compound **8i**

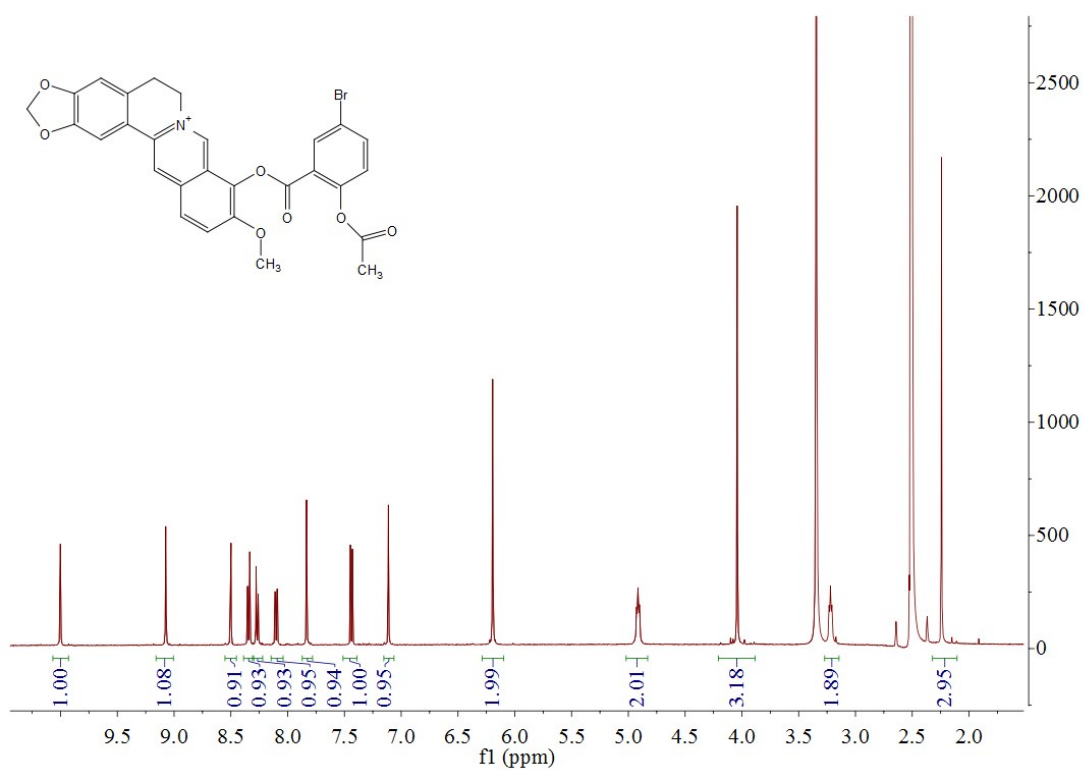

**Figure S26.**  $^1\text{H}$  NMR spectrum of compound **8j**



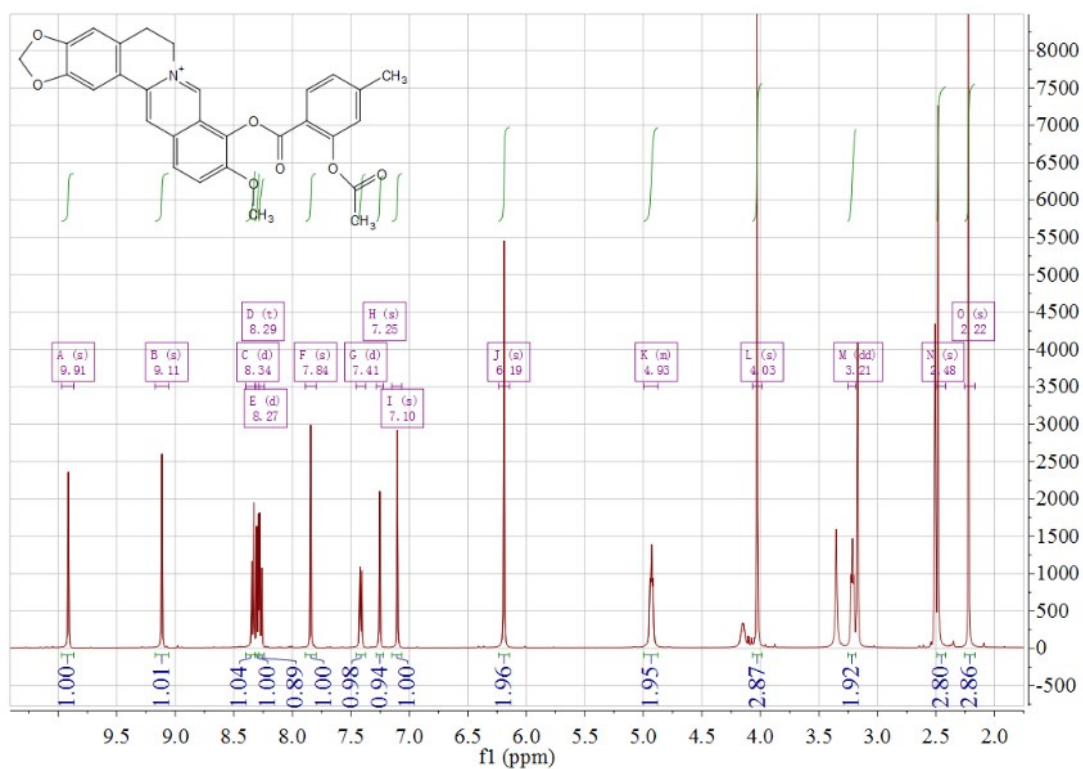

**Figure S27.** <sup>1</sup>H NMR spectrum of compound **8k**

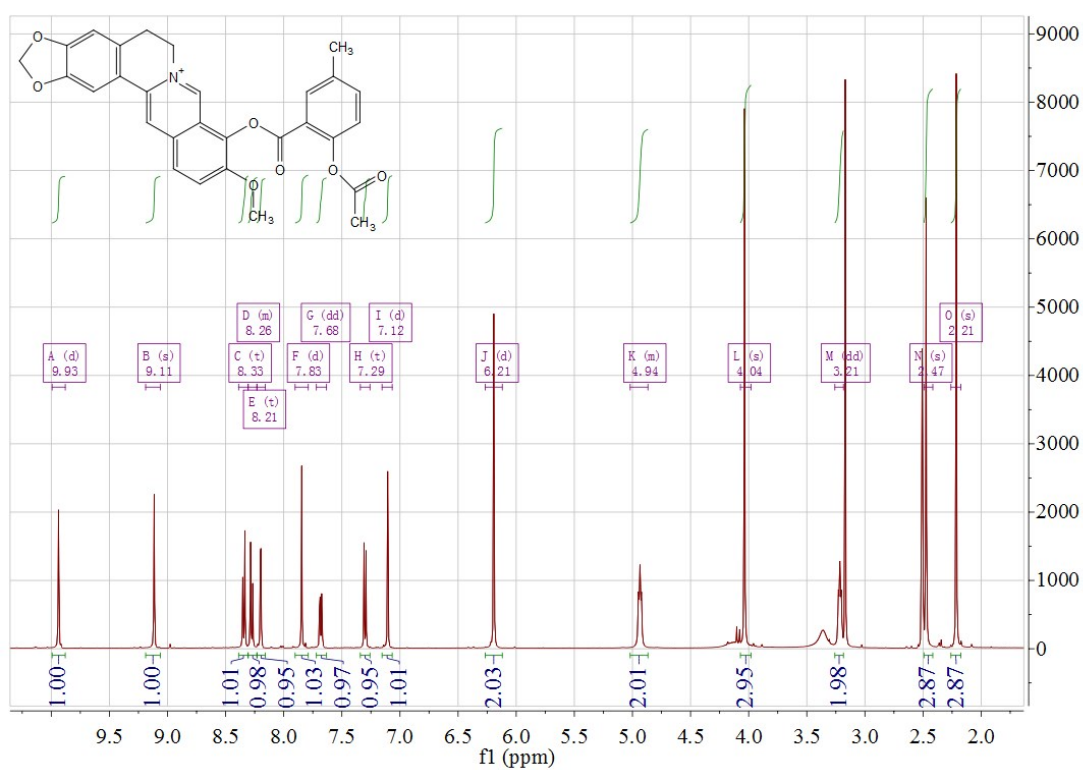

**Figure S28.** <sup>1</sup>H NMR spectrum of compound **8l**

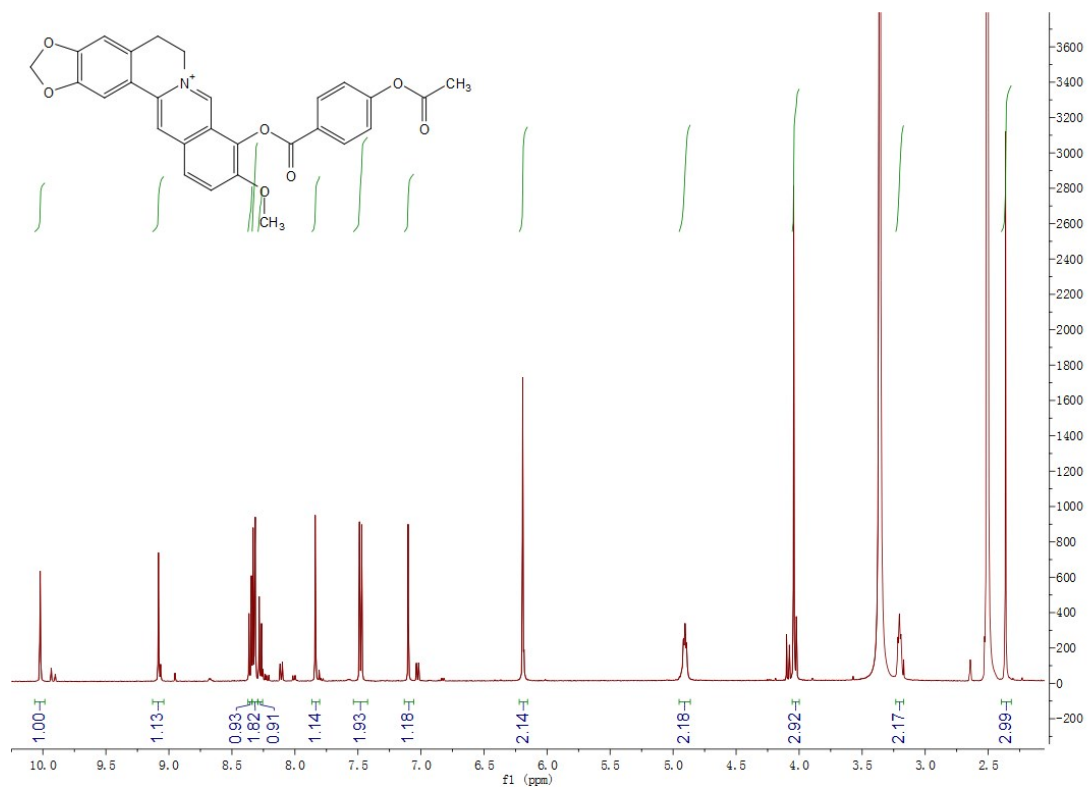

**Figure S29.**  $^1\text{H}$  NMR spectrum of compound **8m**

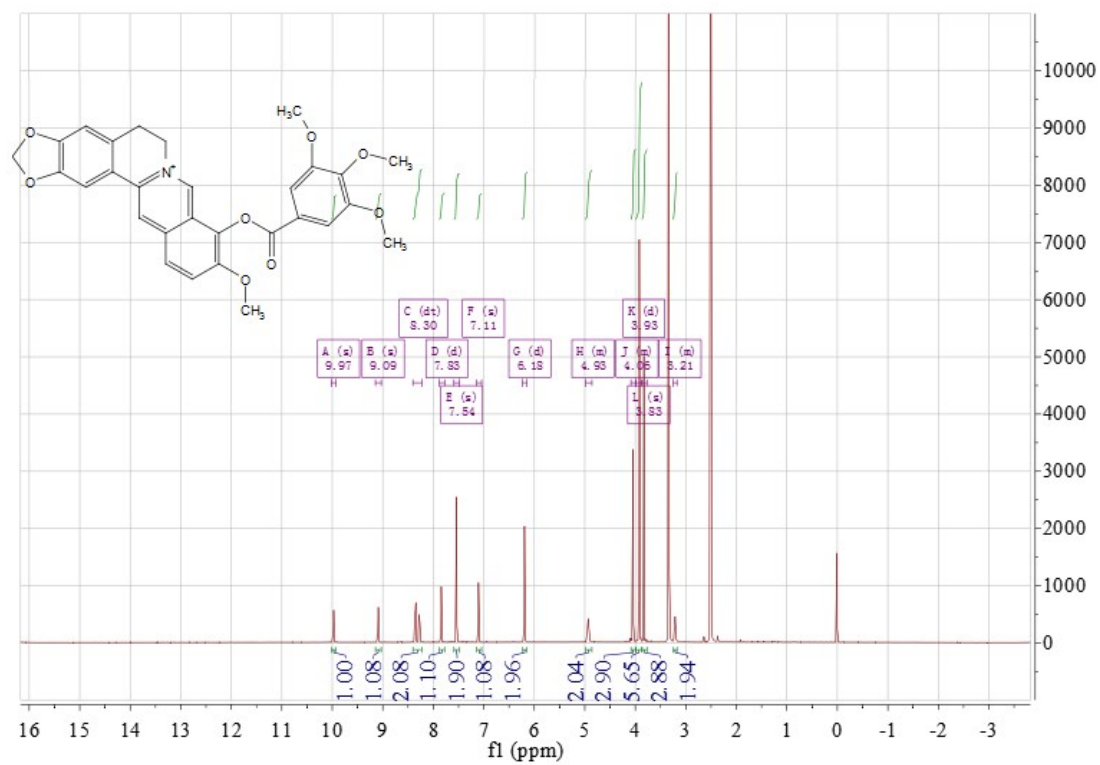

**Figure S30.**  $^1\text{H}$  NMR spectrum of compound **8n**

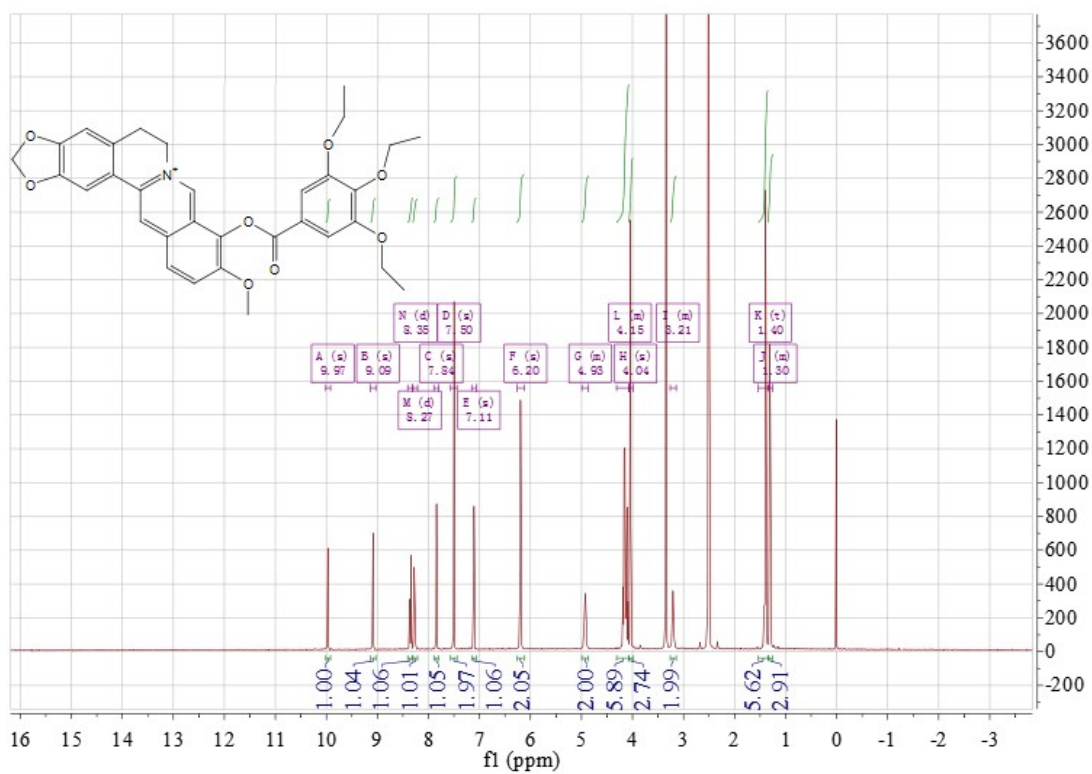

Figure S31. <sup>1</sup>H NMR spectrum of compound **8o**

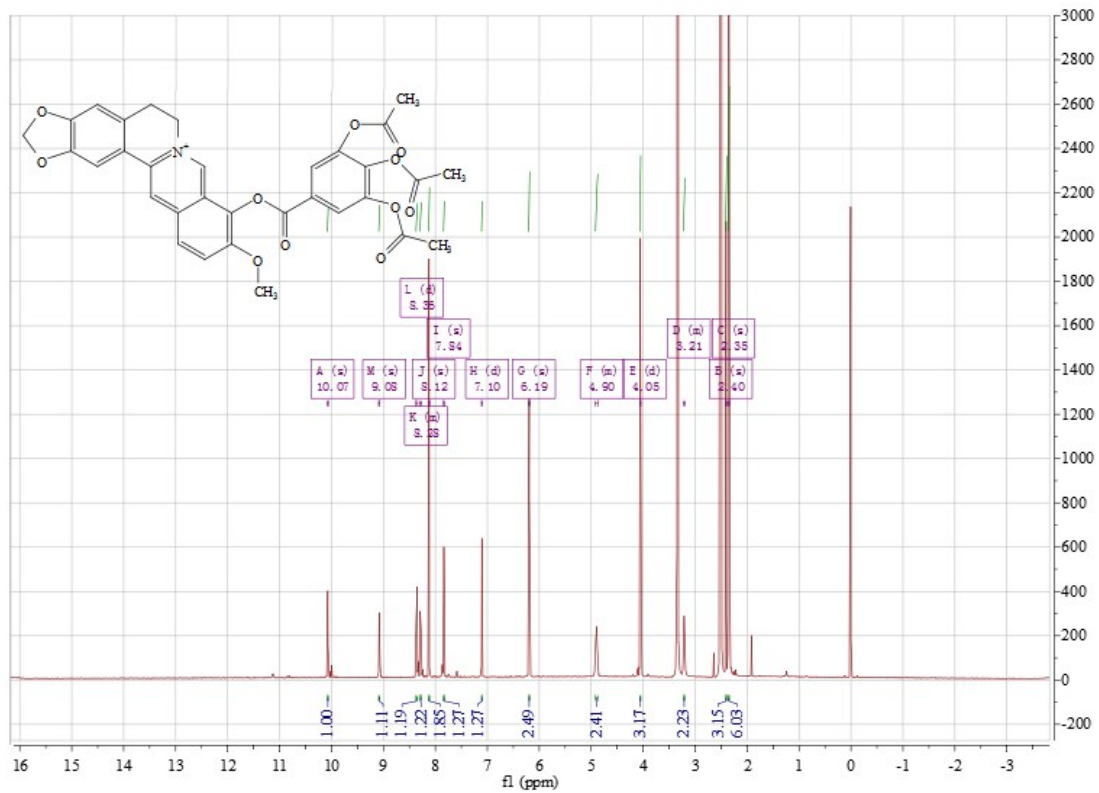

Figure S32. <sup>1</sup>H NMR spectrum of compound **8p**

## Infrared spectrum

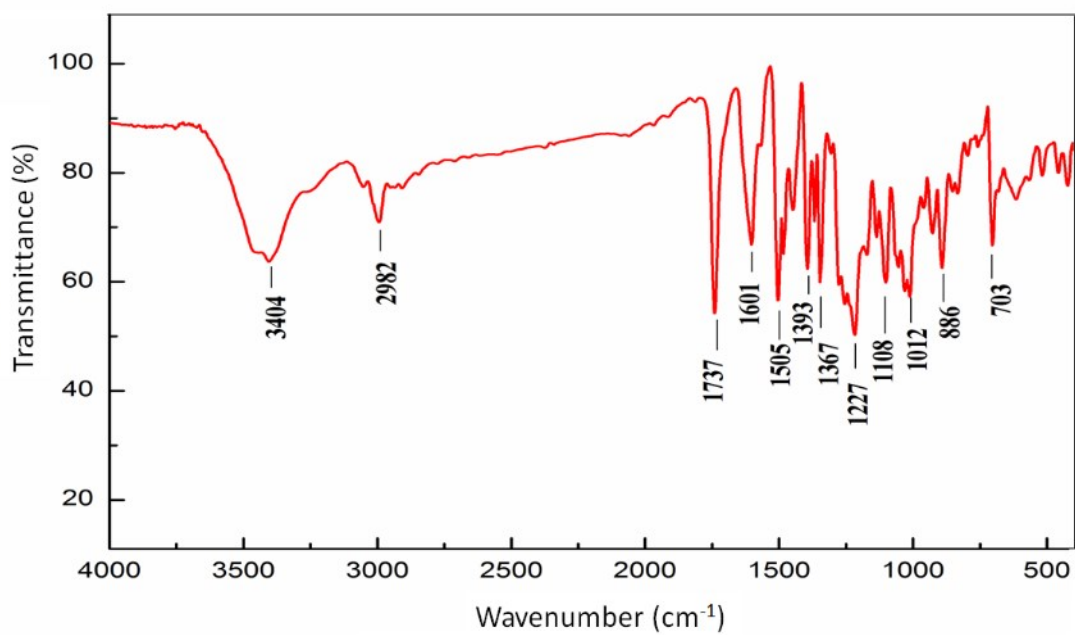

**Figure S33.** Infrared spectrum of compound **8a**

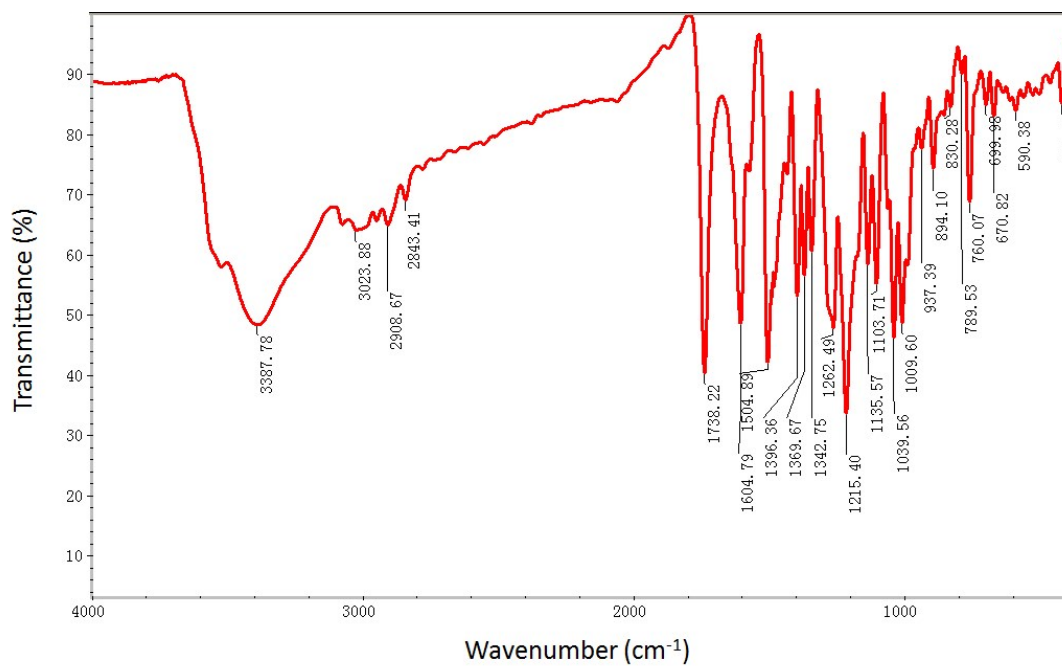

**Figure S34.** Infrared spectrum of compound **8b**

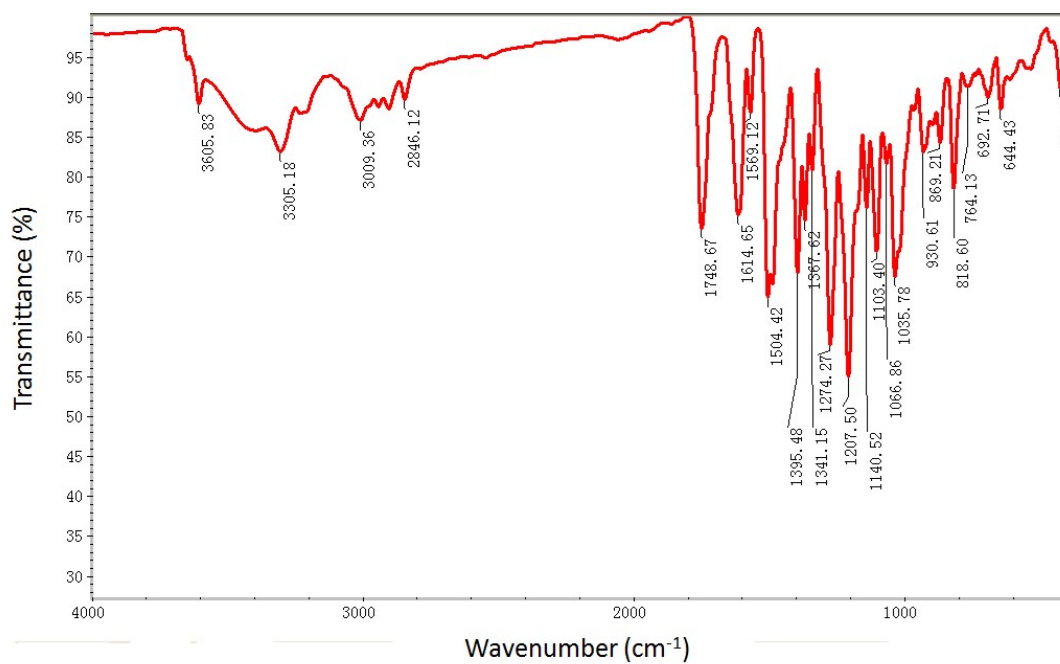

**Figure S35.** Infrared spectrum of compound **8c**

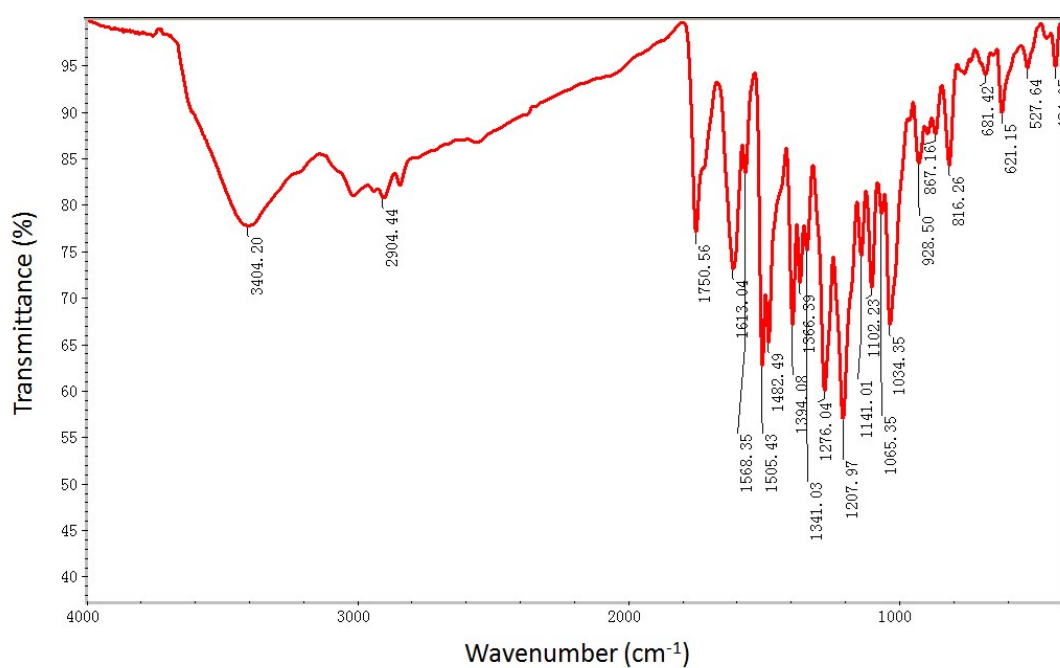

**Figure S36.** Infrared spectrum of compound **8d**

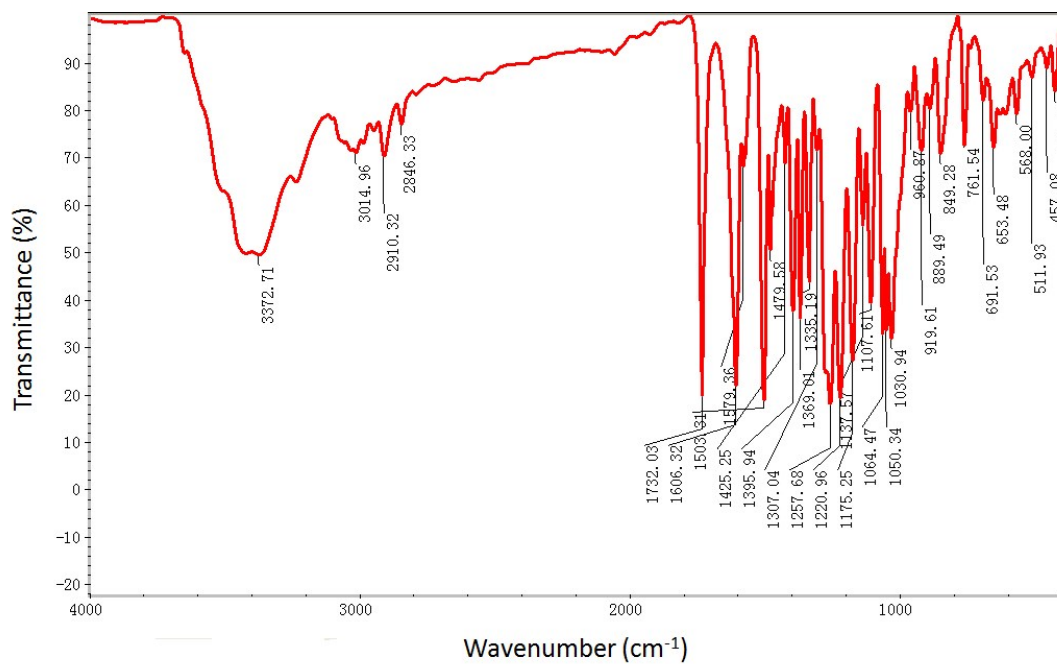

**Figure S37.** Infrared spectrum of compound **8e**

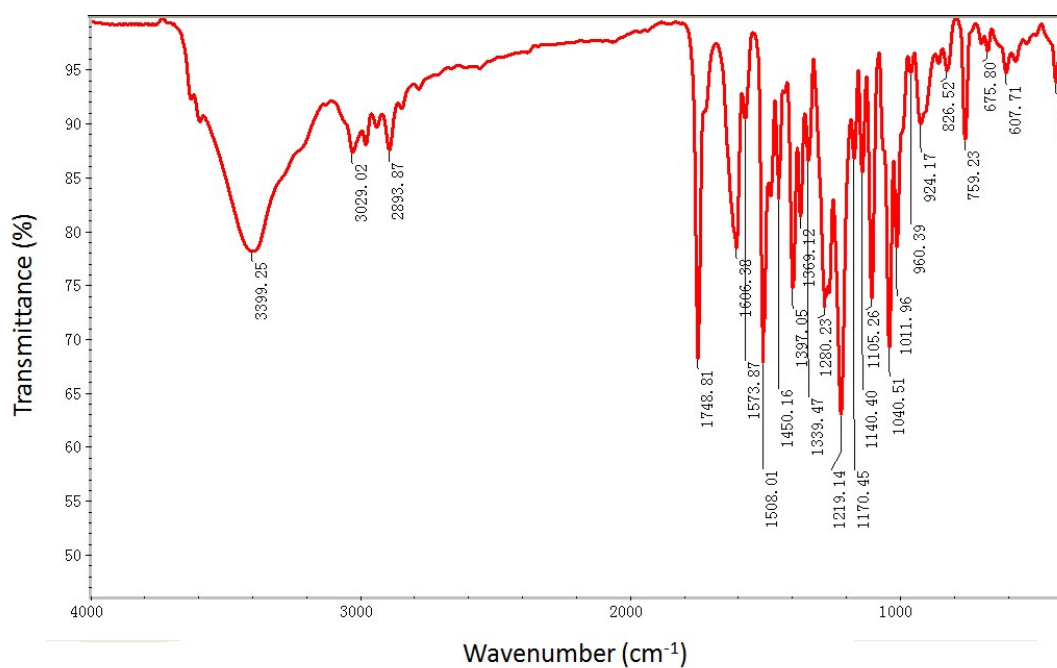

**Figure S38.** Infrared spectrum of compound **8f**

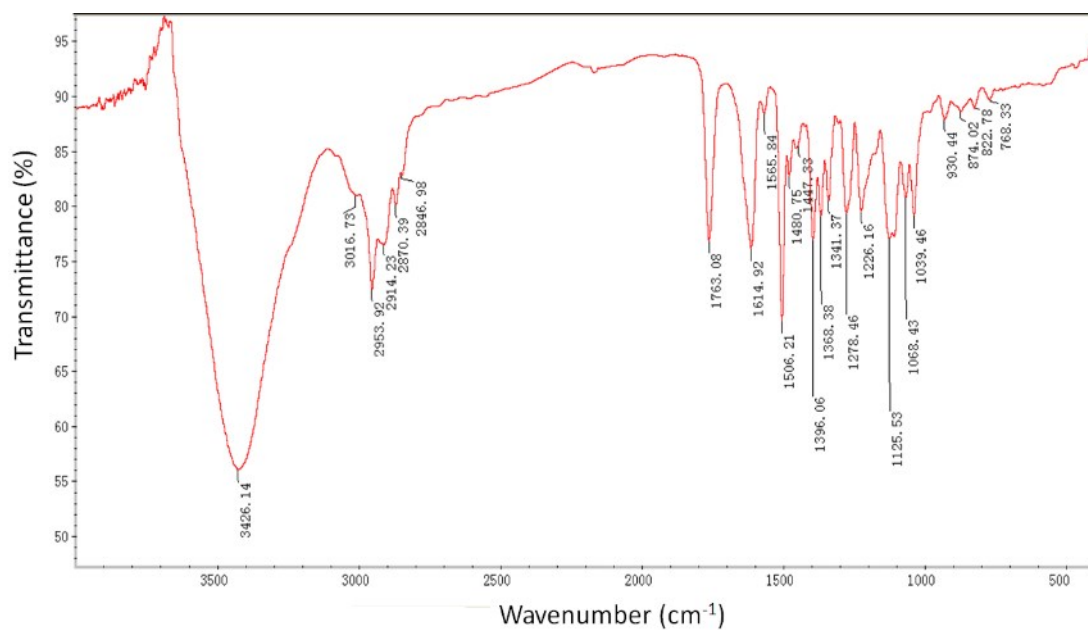

Figure S39. Infrared spectrum of compound 8g

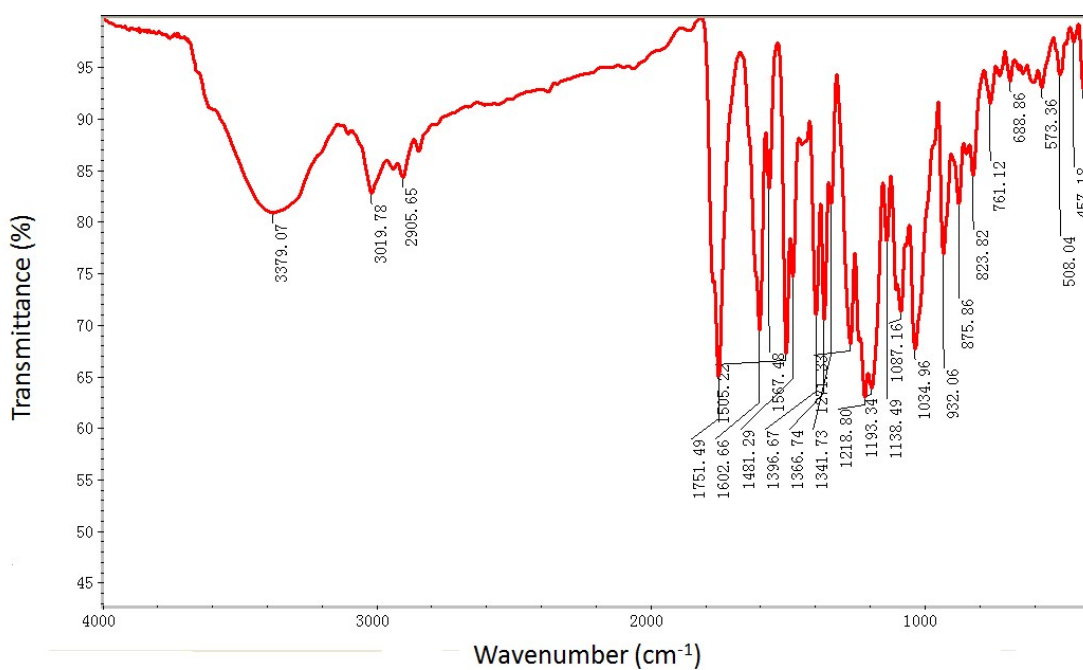

Figure S40. Infrared spectrum of compound 8h



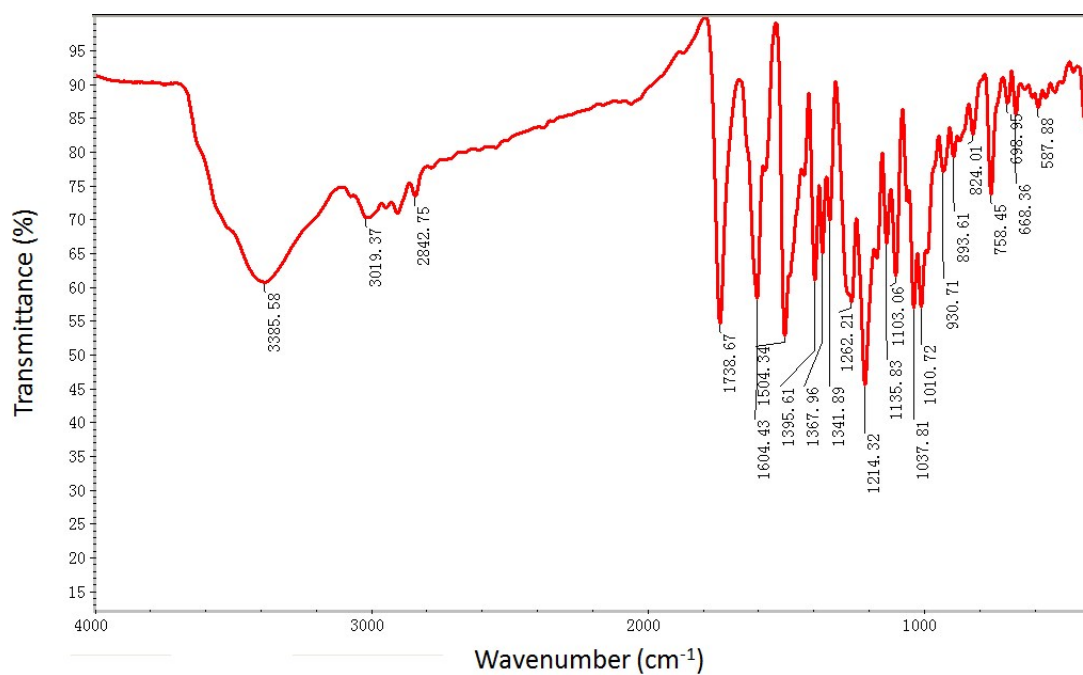

**Figure S41.** Infrared spectrum of compound **8i**

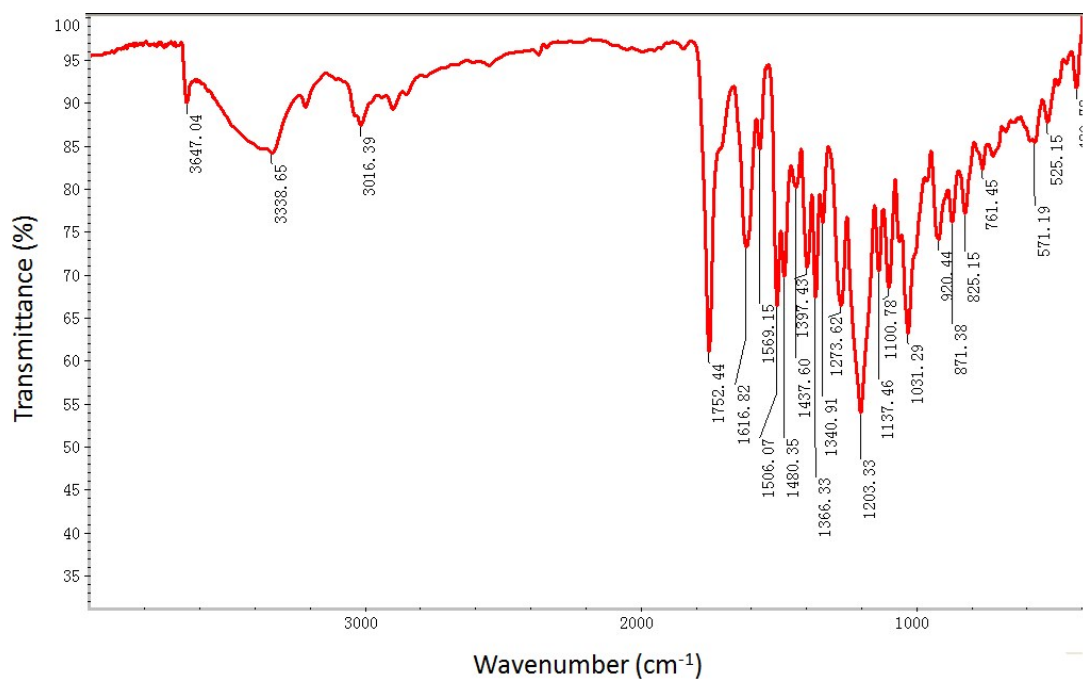

**Figure S42.** Infrared spectrum of compound **8j**



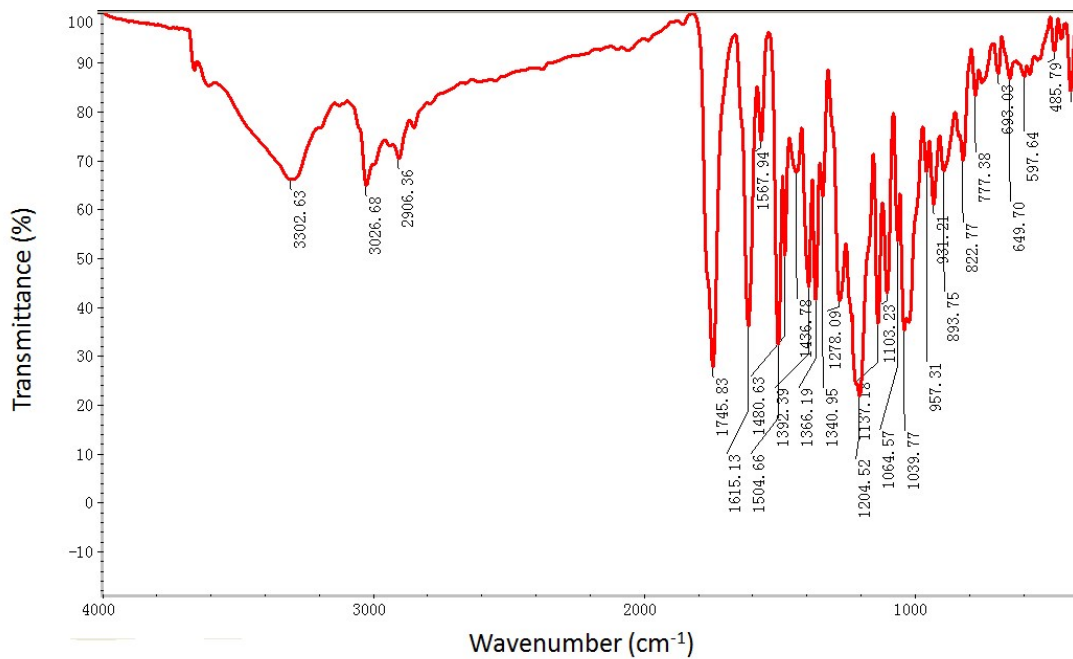

**Figure S43.** Infrared spectrum of compound **8k**

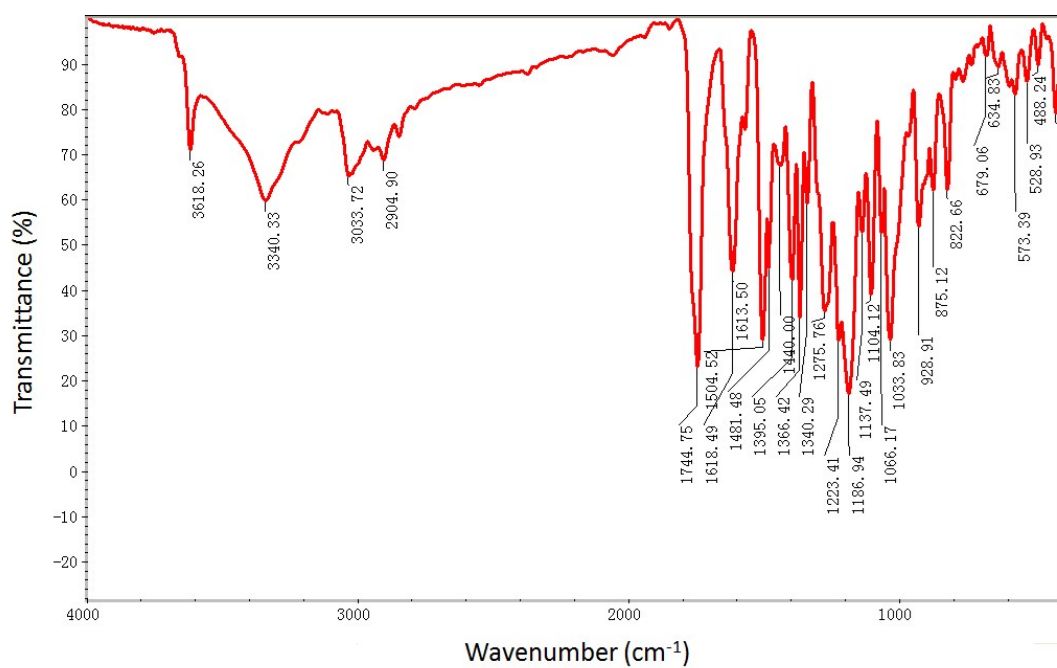

**Figure S44.** Infrared spectrum of compound **8l**

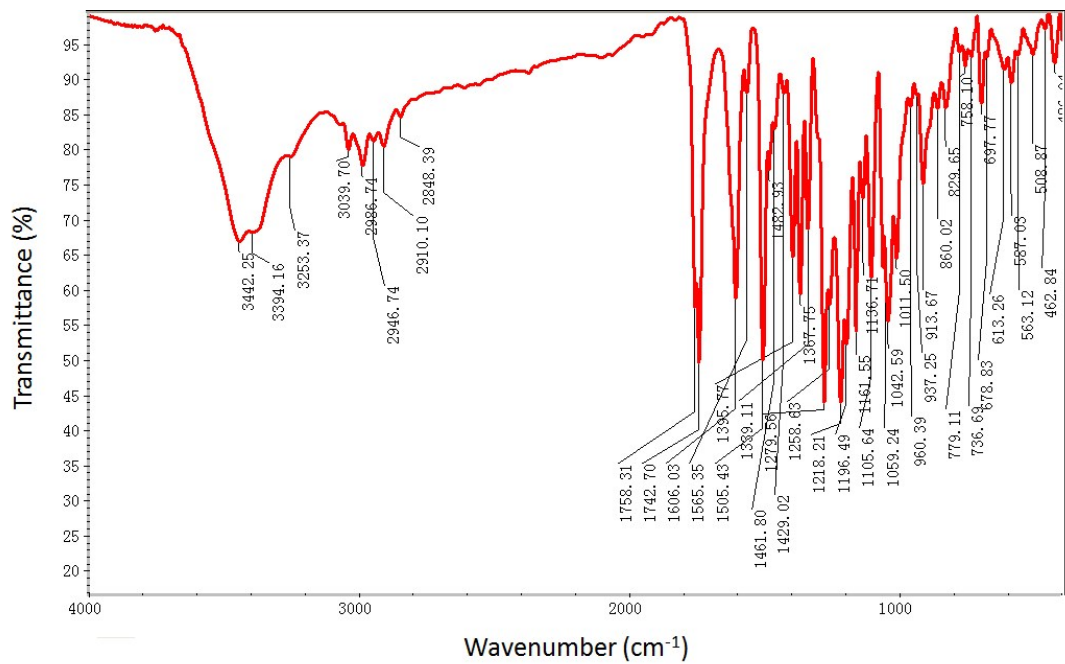

Figure S45. Infrared spectrum of compound **8m**

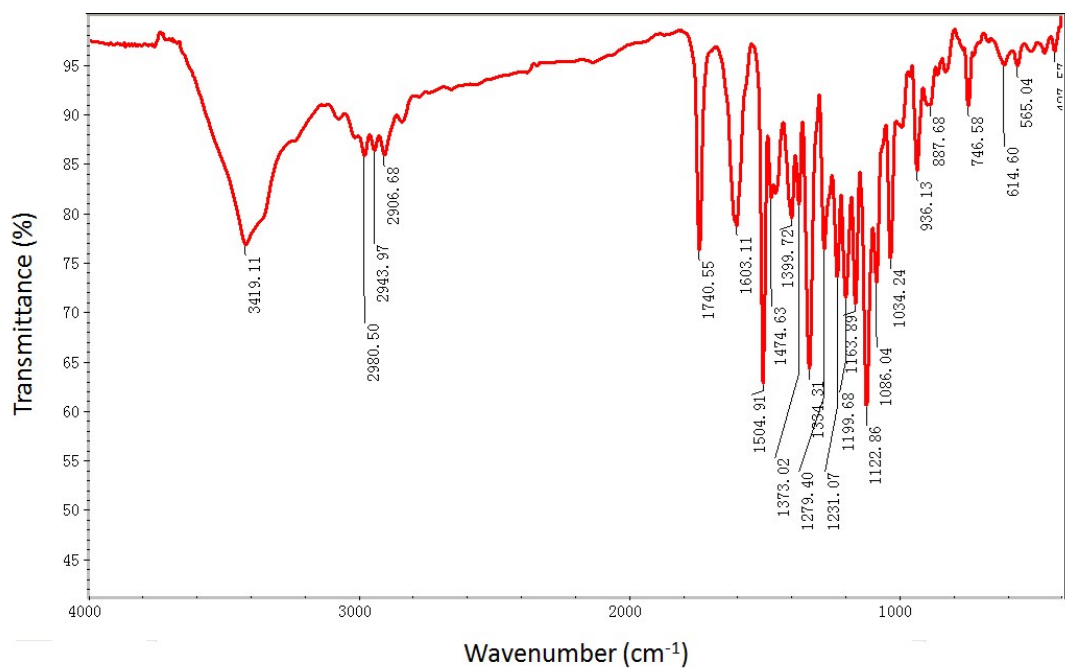

Figure S46. Infrared spectrum of compound **8n**

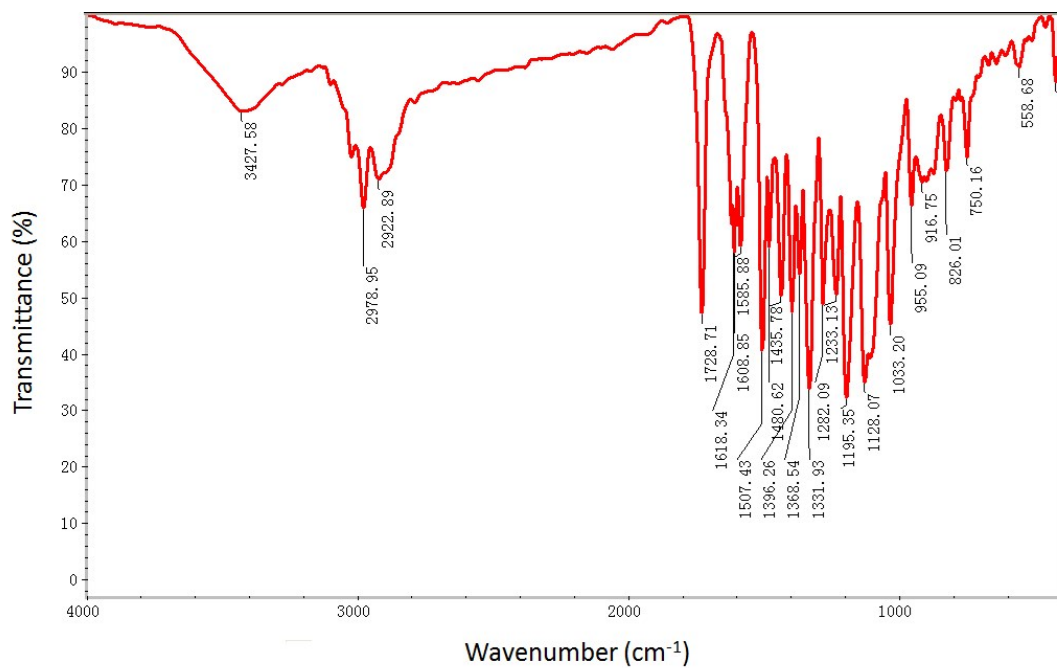

**Figure S47.** Infrared spectrum of compound **8o**

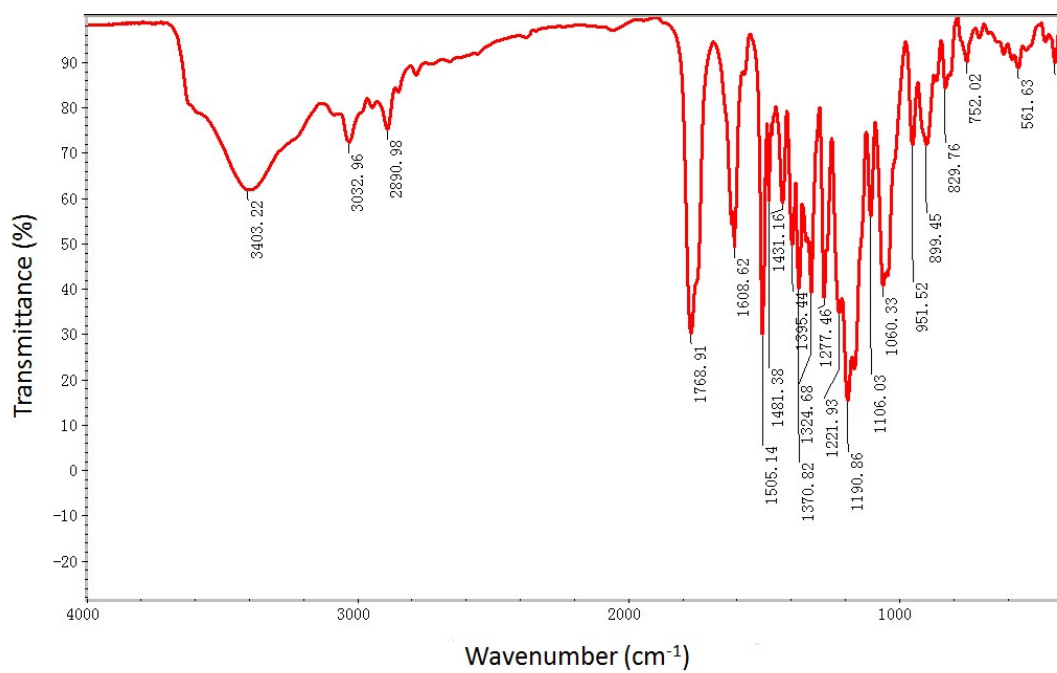

**Figure S48.** Infrared spectrum of compound **8p**
